# Supplementary material for: Synthesis and evaluation of novel purple acid phosphatase inhibitors
Source: Royal Society of Chemistry journal article supplement (doi:10.1039/c8md00491a), 2018-11-13

## **Synthesis and evaluation of novel purple acid phosphatase inhibitors**

Waleed M. Hussein,<sup>ab</sup> Daniel Feder,<sup>a</sup> Gerhard Schenk,<sup>ac</sup> Luke W. Guddat<sup>a</sup> and Ross P. McGeary<sup>\*a</sup>

<sup>a</sup>The University of Queensland, School of Chemistry and Molecular Biosciences, Brisbane, QLD 4072, Australia

<sup>b</sup>Helwan University, Pharmaceutical Organic Chemistry Department, Faculty of Pharmacy, Ein Helwan, Helwan, Egypt

<sup>c</sup>The University of Queensland, Australian Centre for Ecogenomics, Brisbane, QLD 4072, Australia

\*Corresponding author: E-mail address [r.mcgeary@uq.edu.au](mailto:r.mcgeary@uq.edu.au)

## The steady state inhibition of pig PAP by 1a-f at pH 4.9

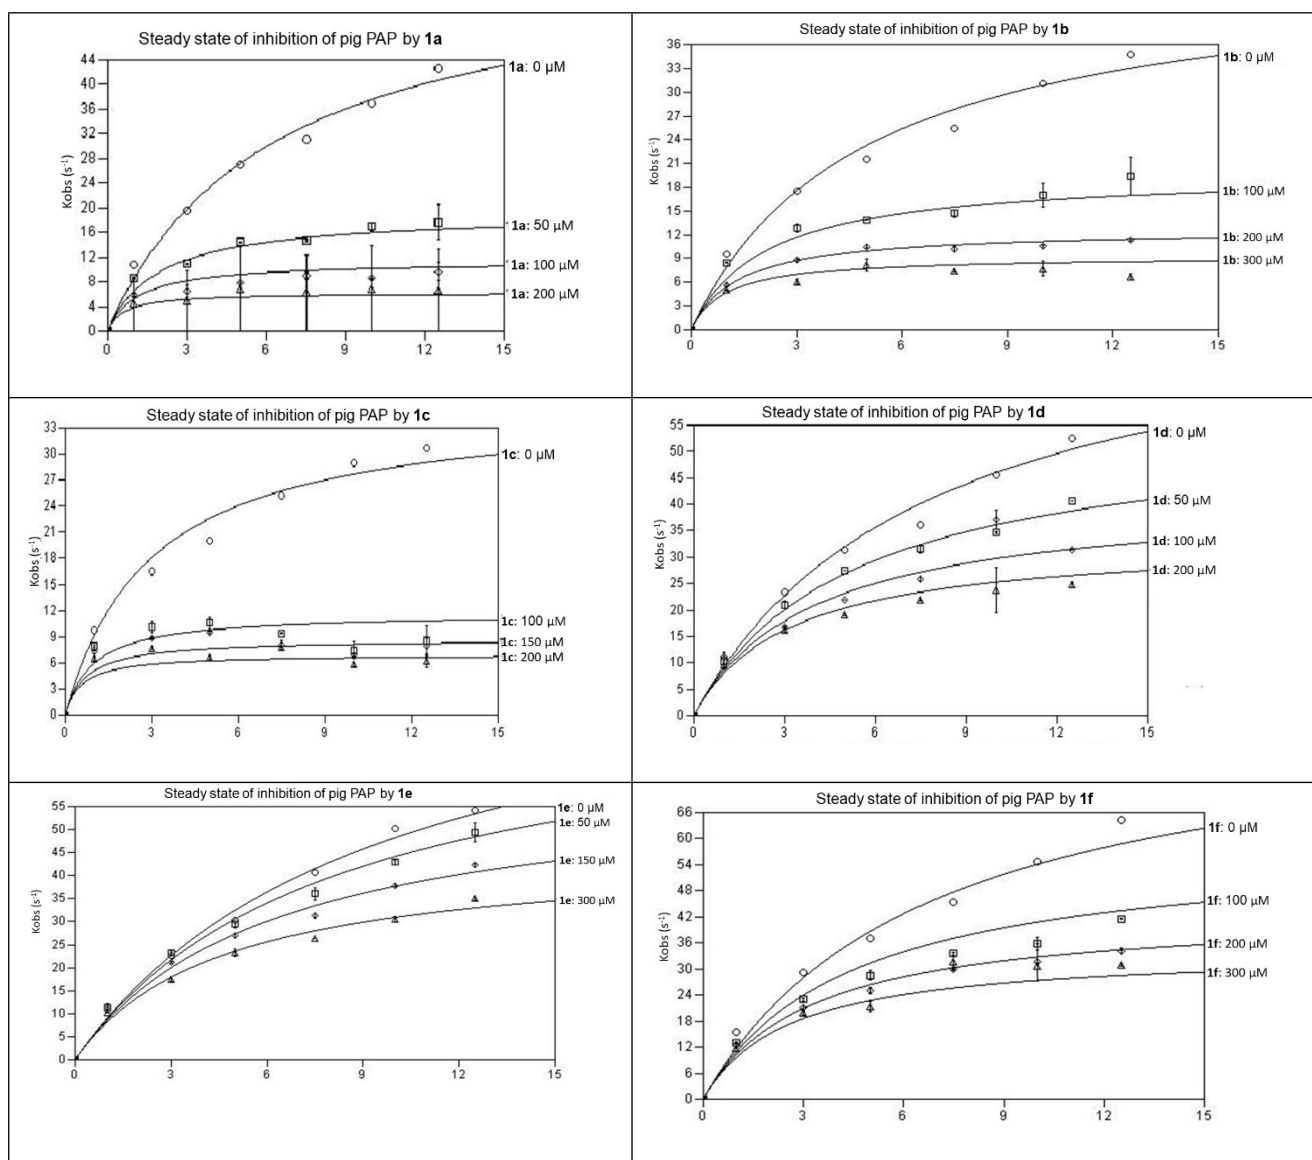

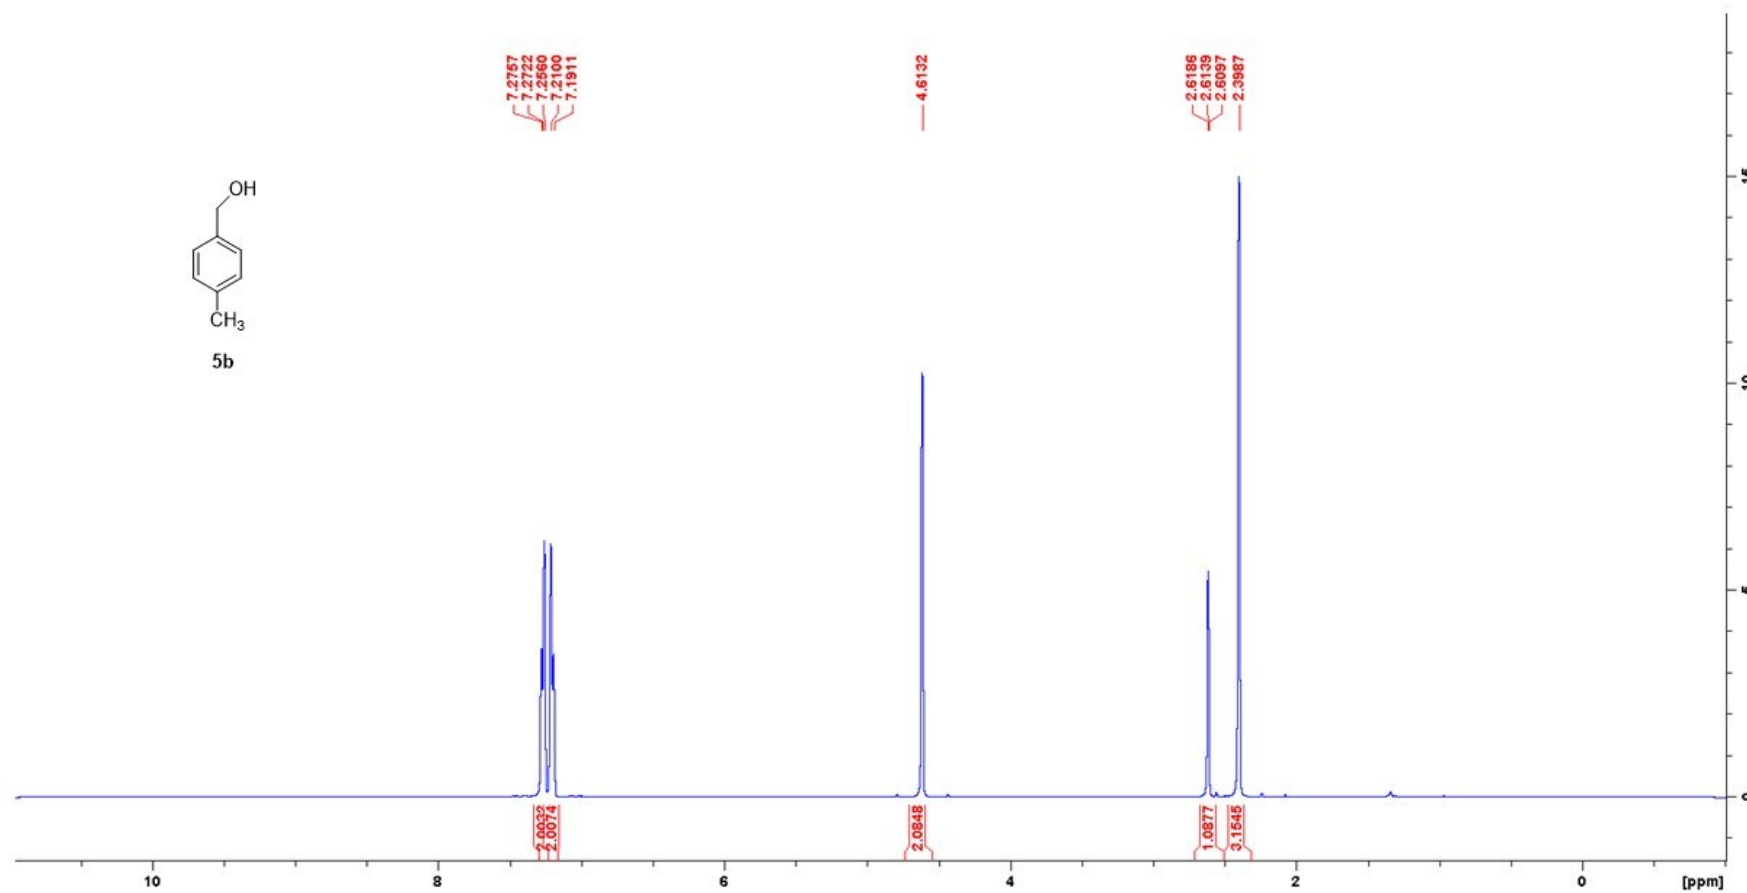

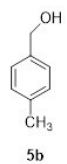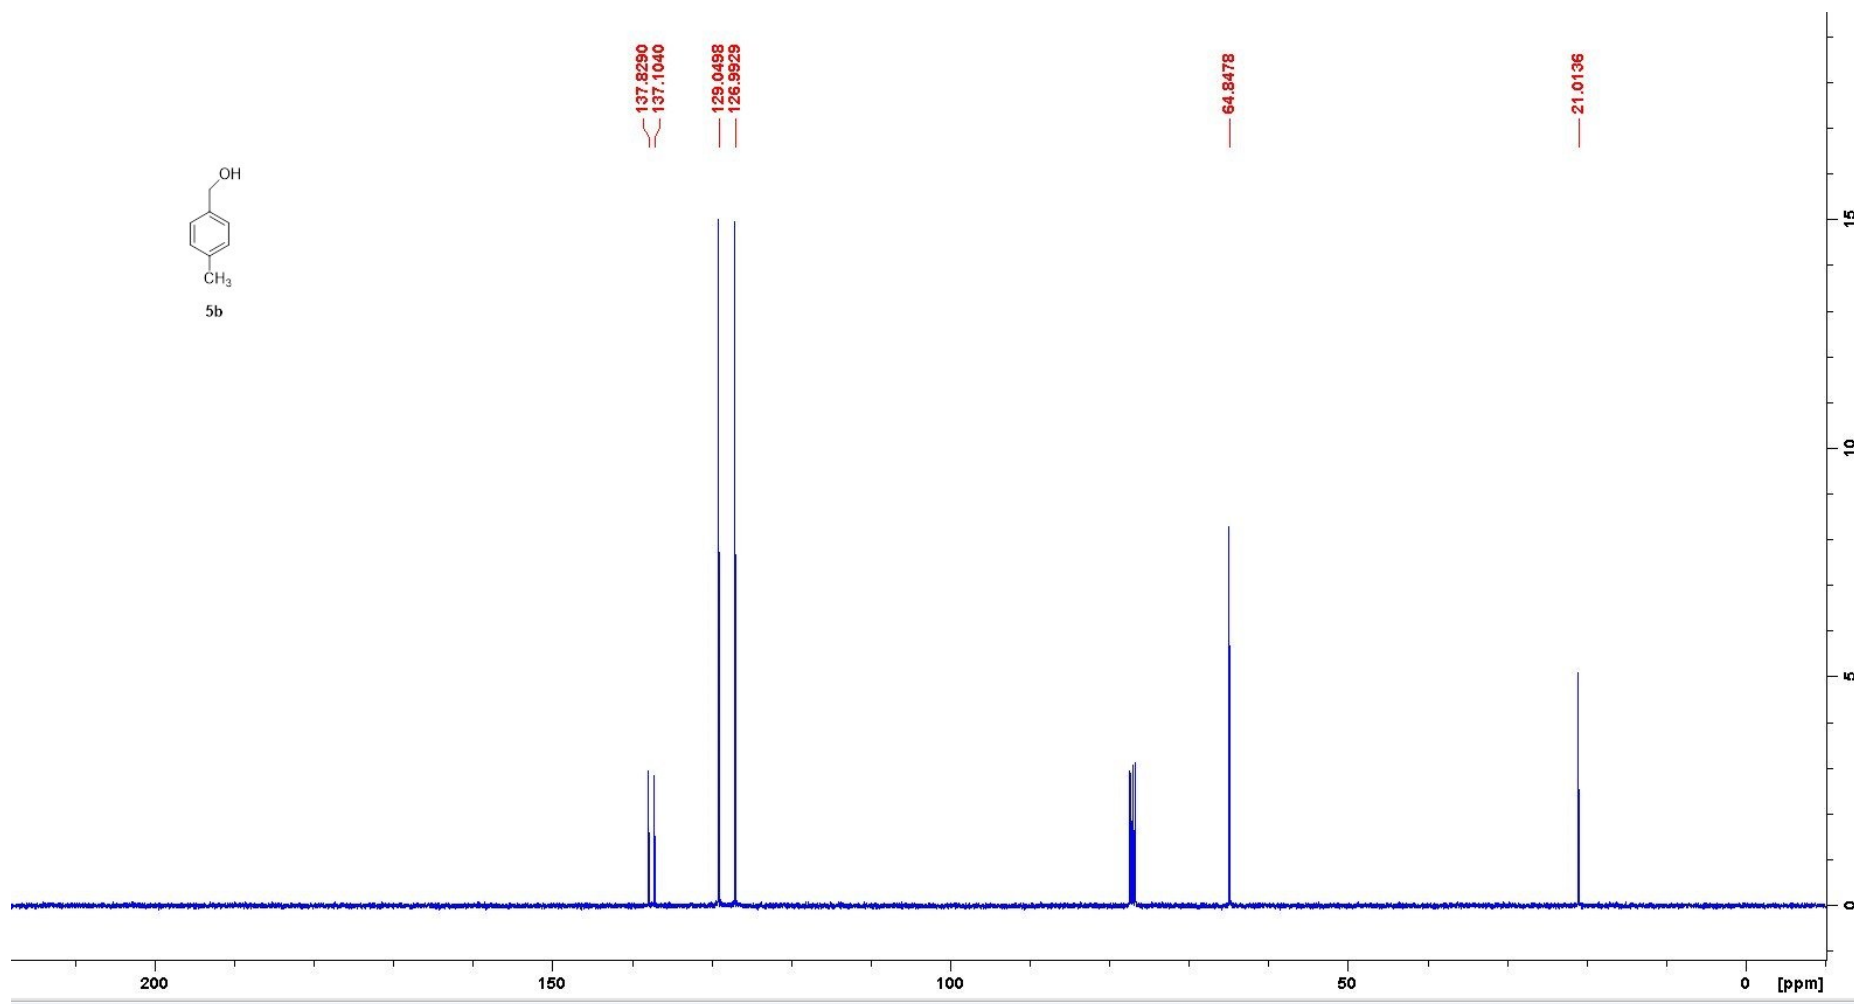

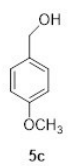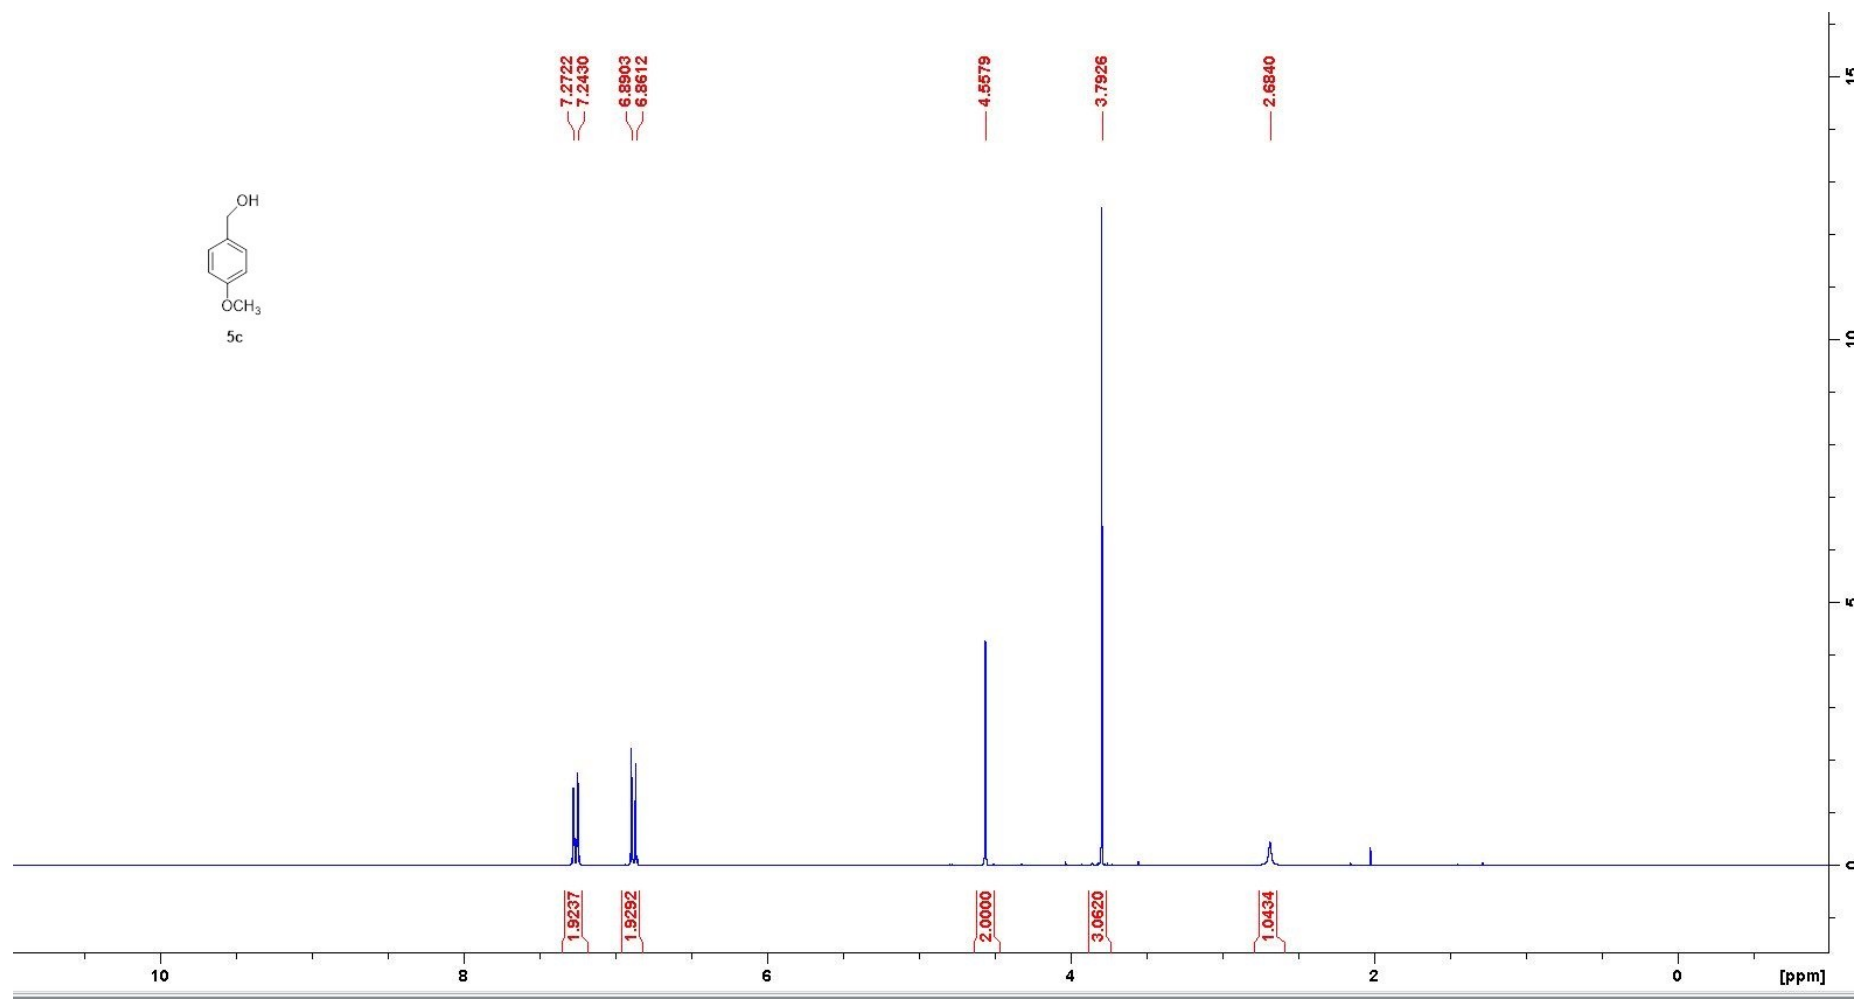

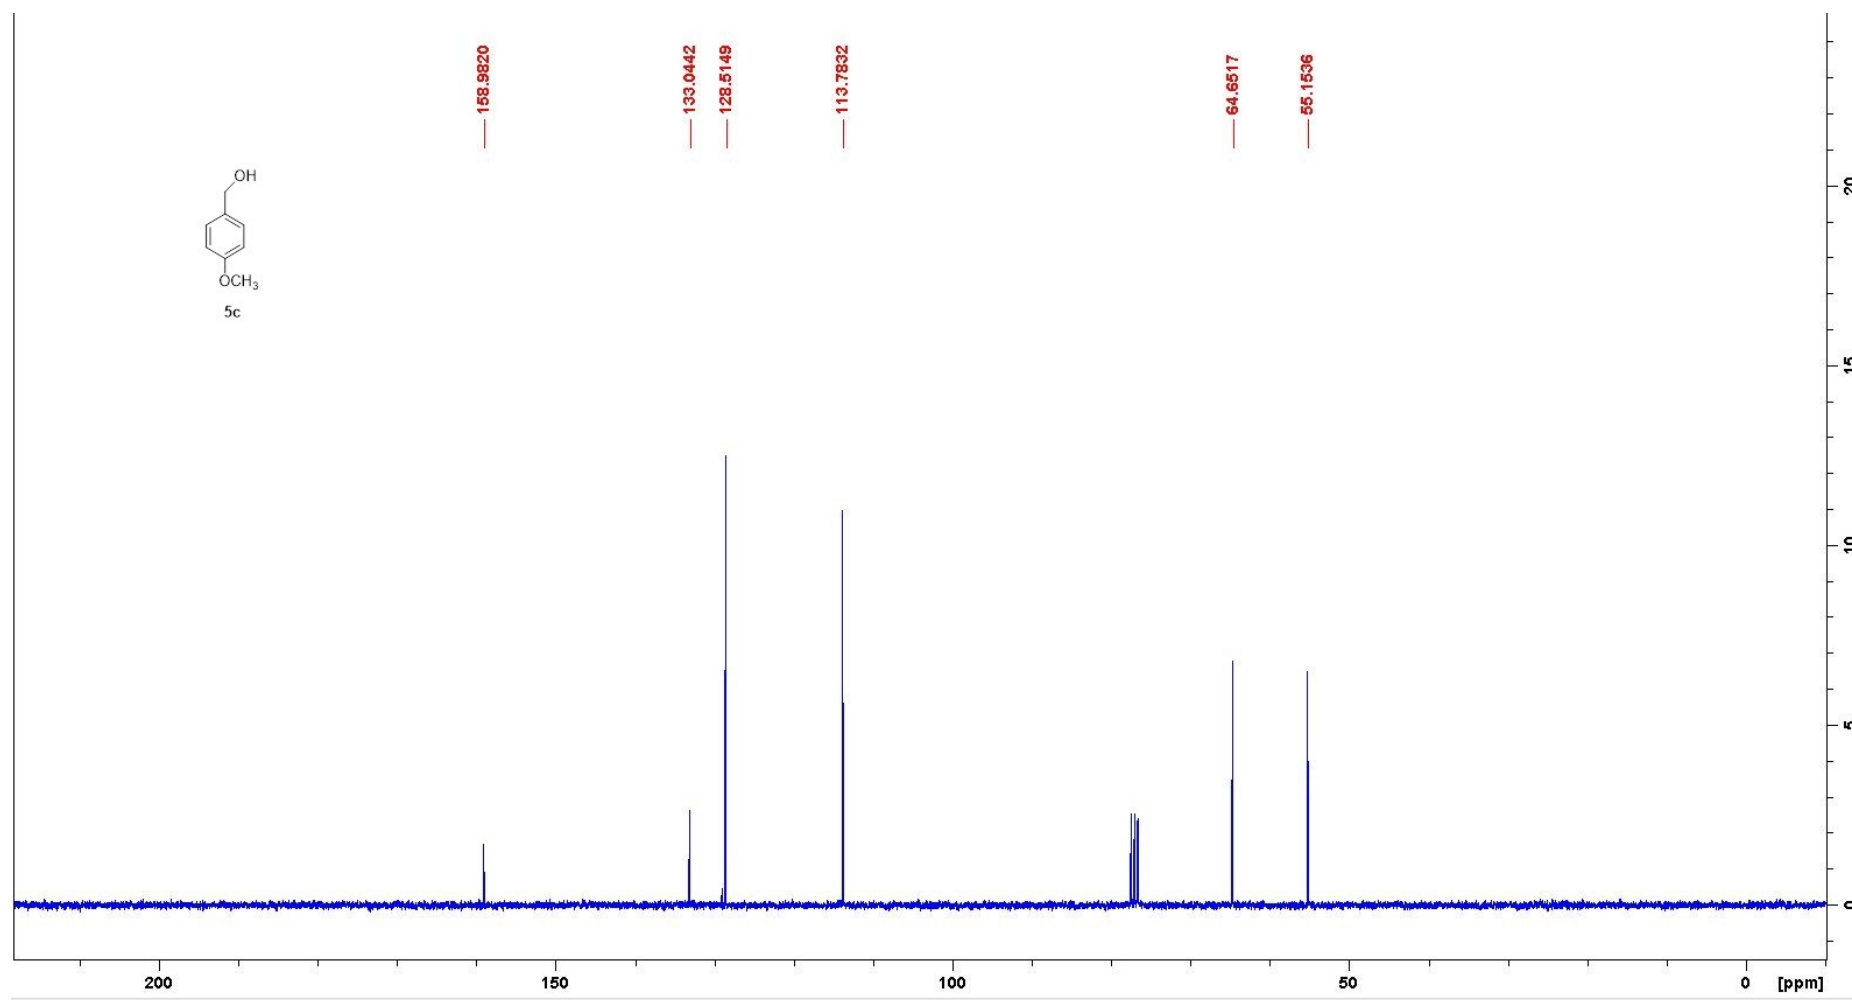

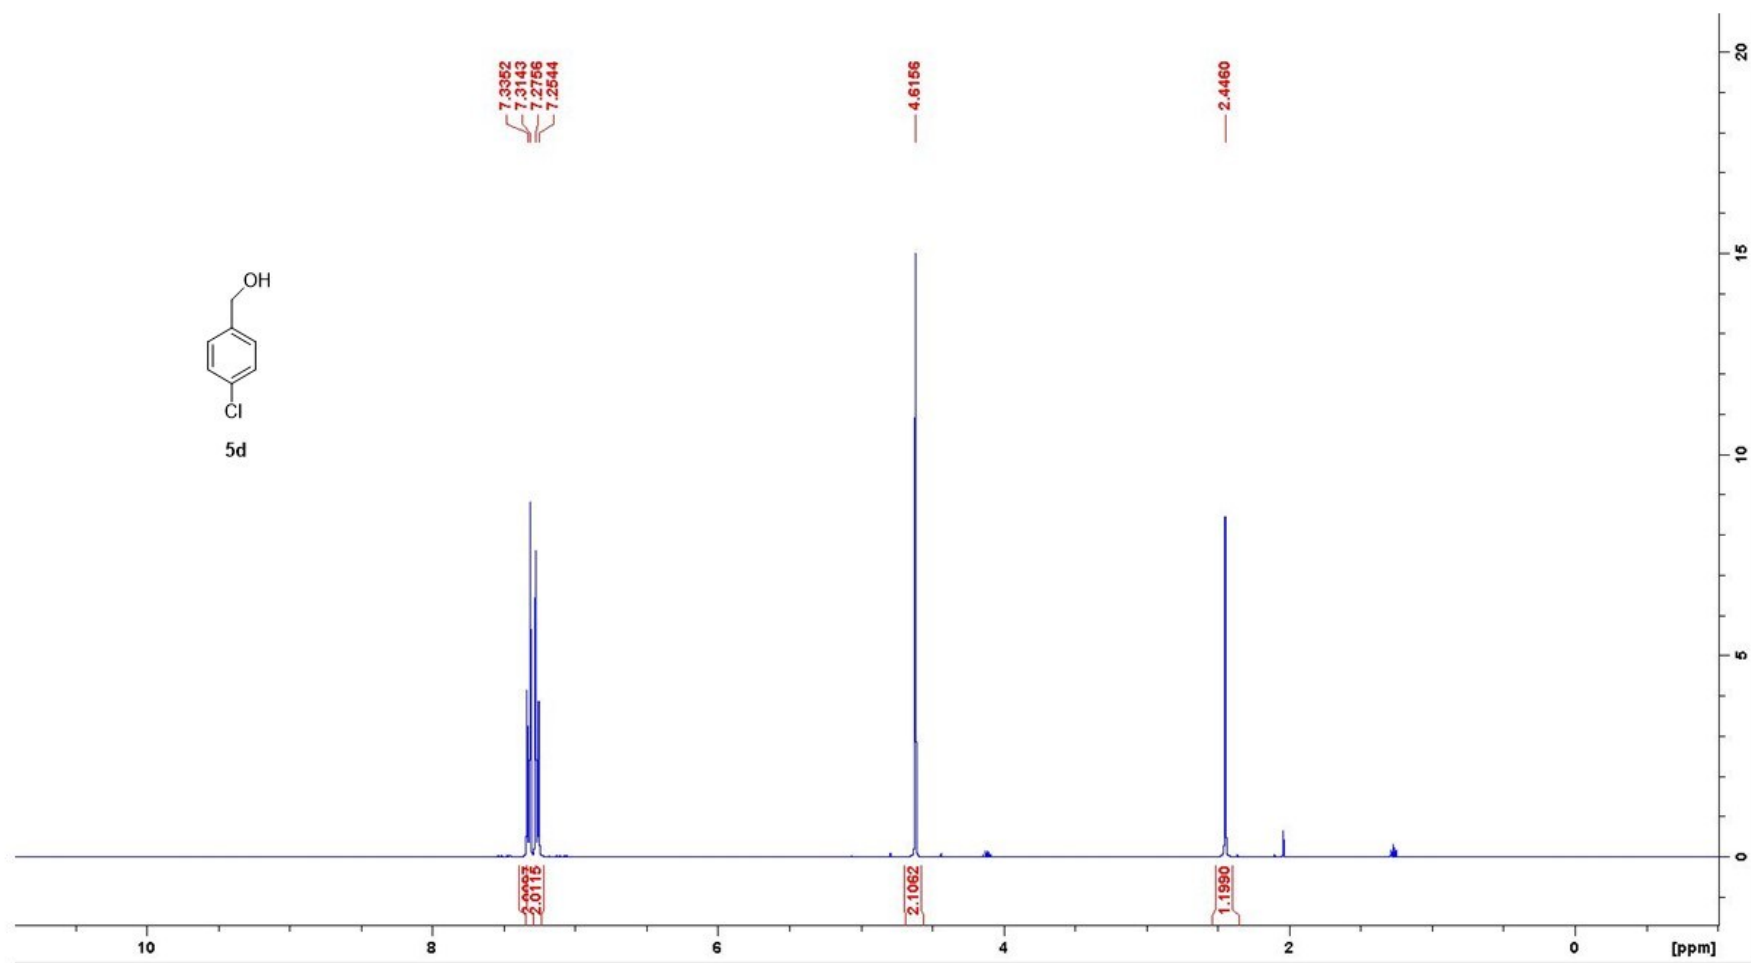

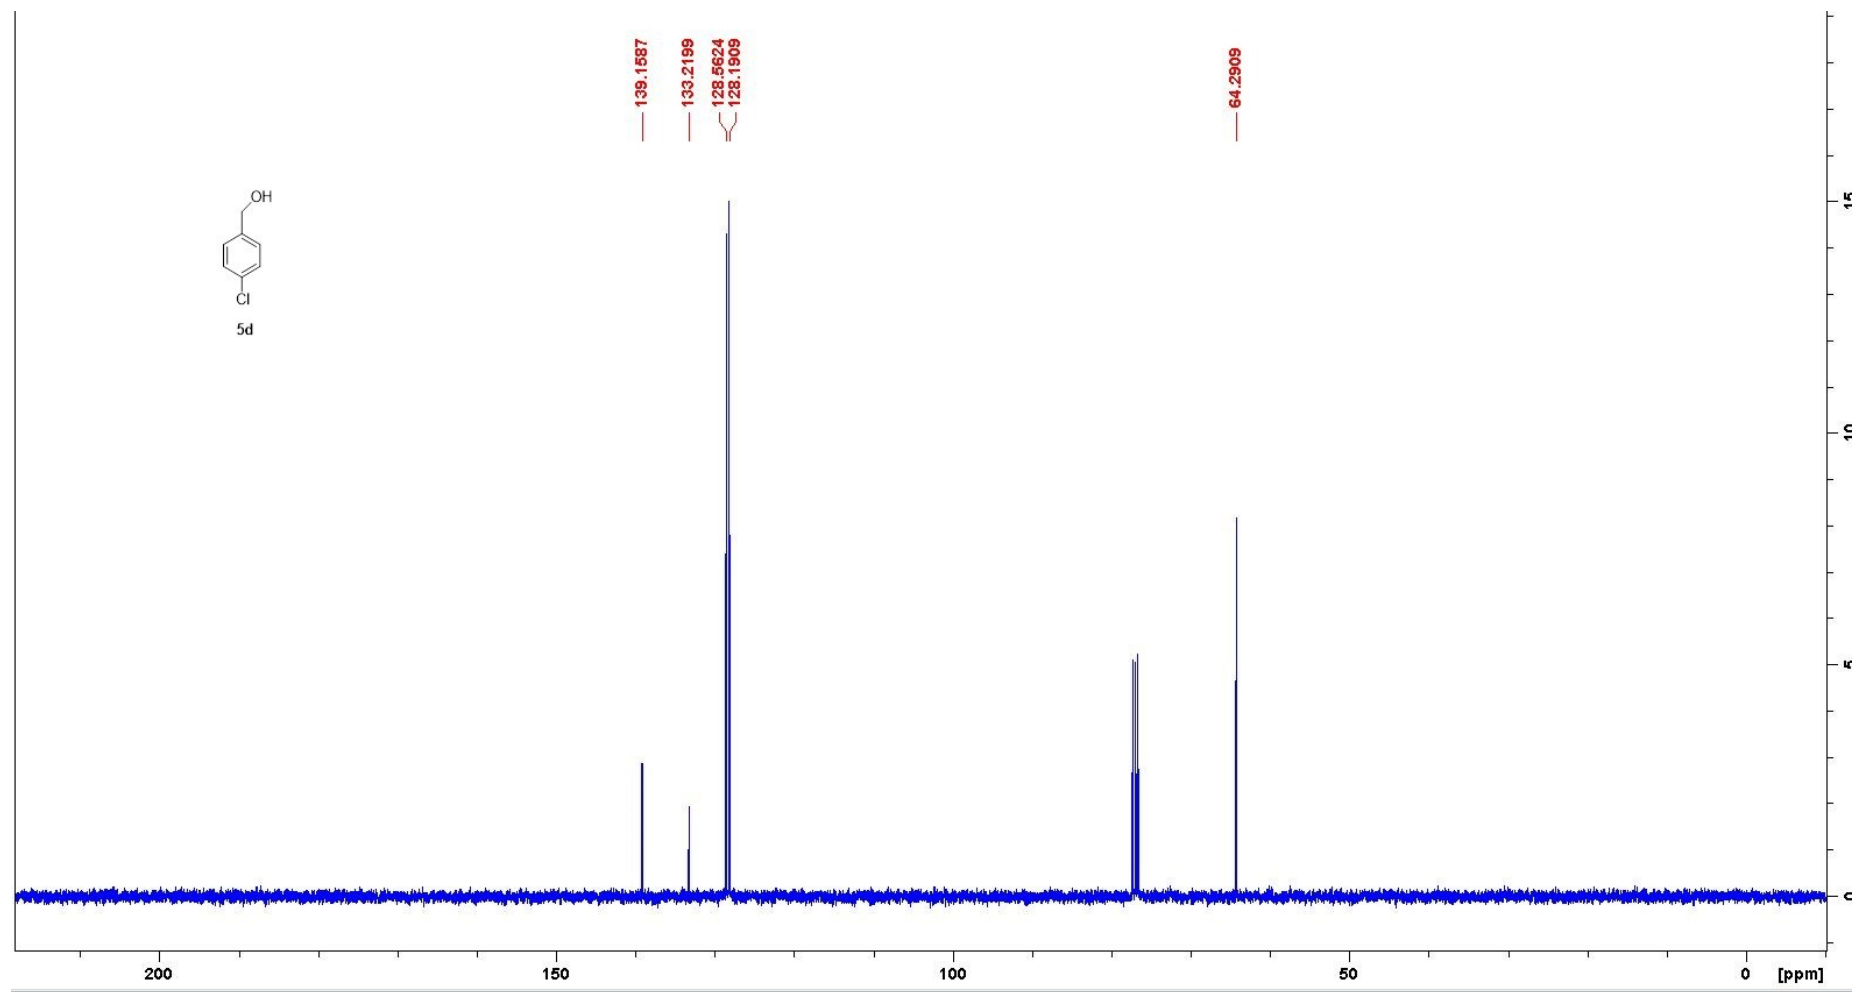



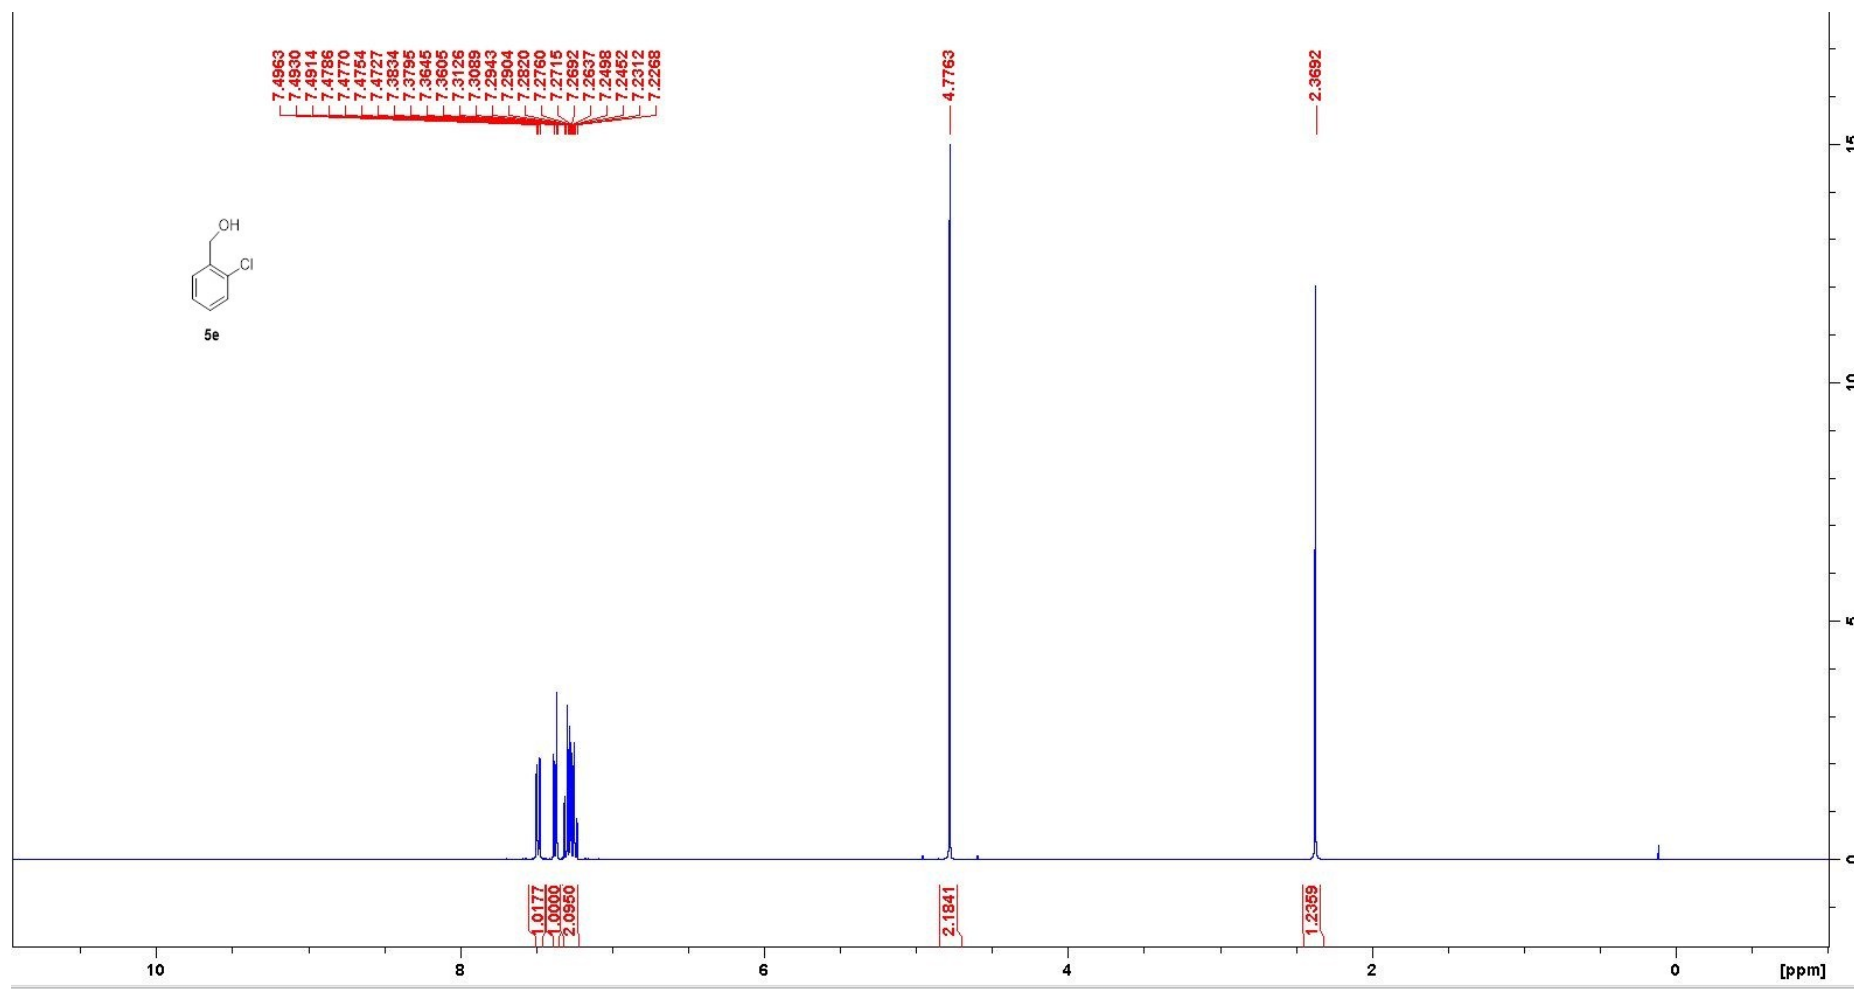

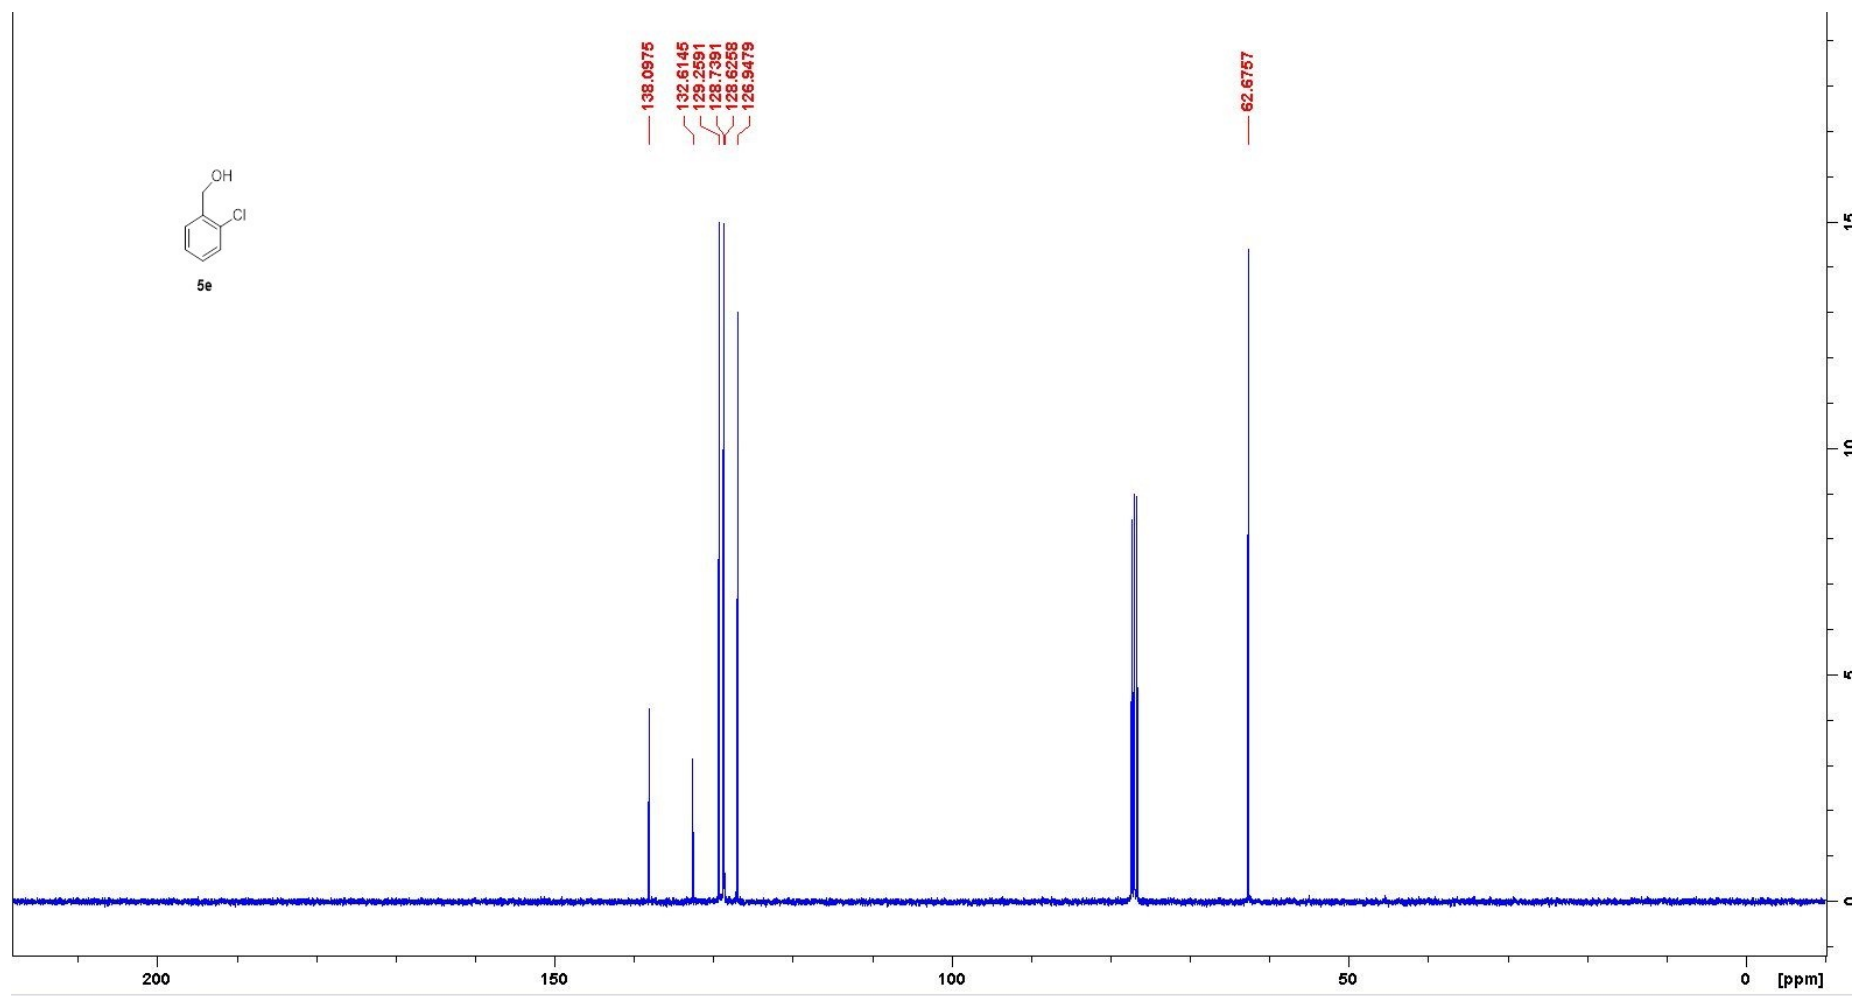

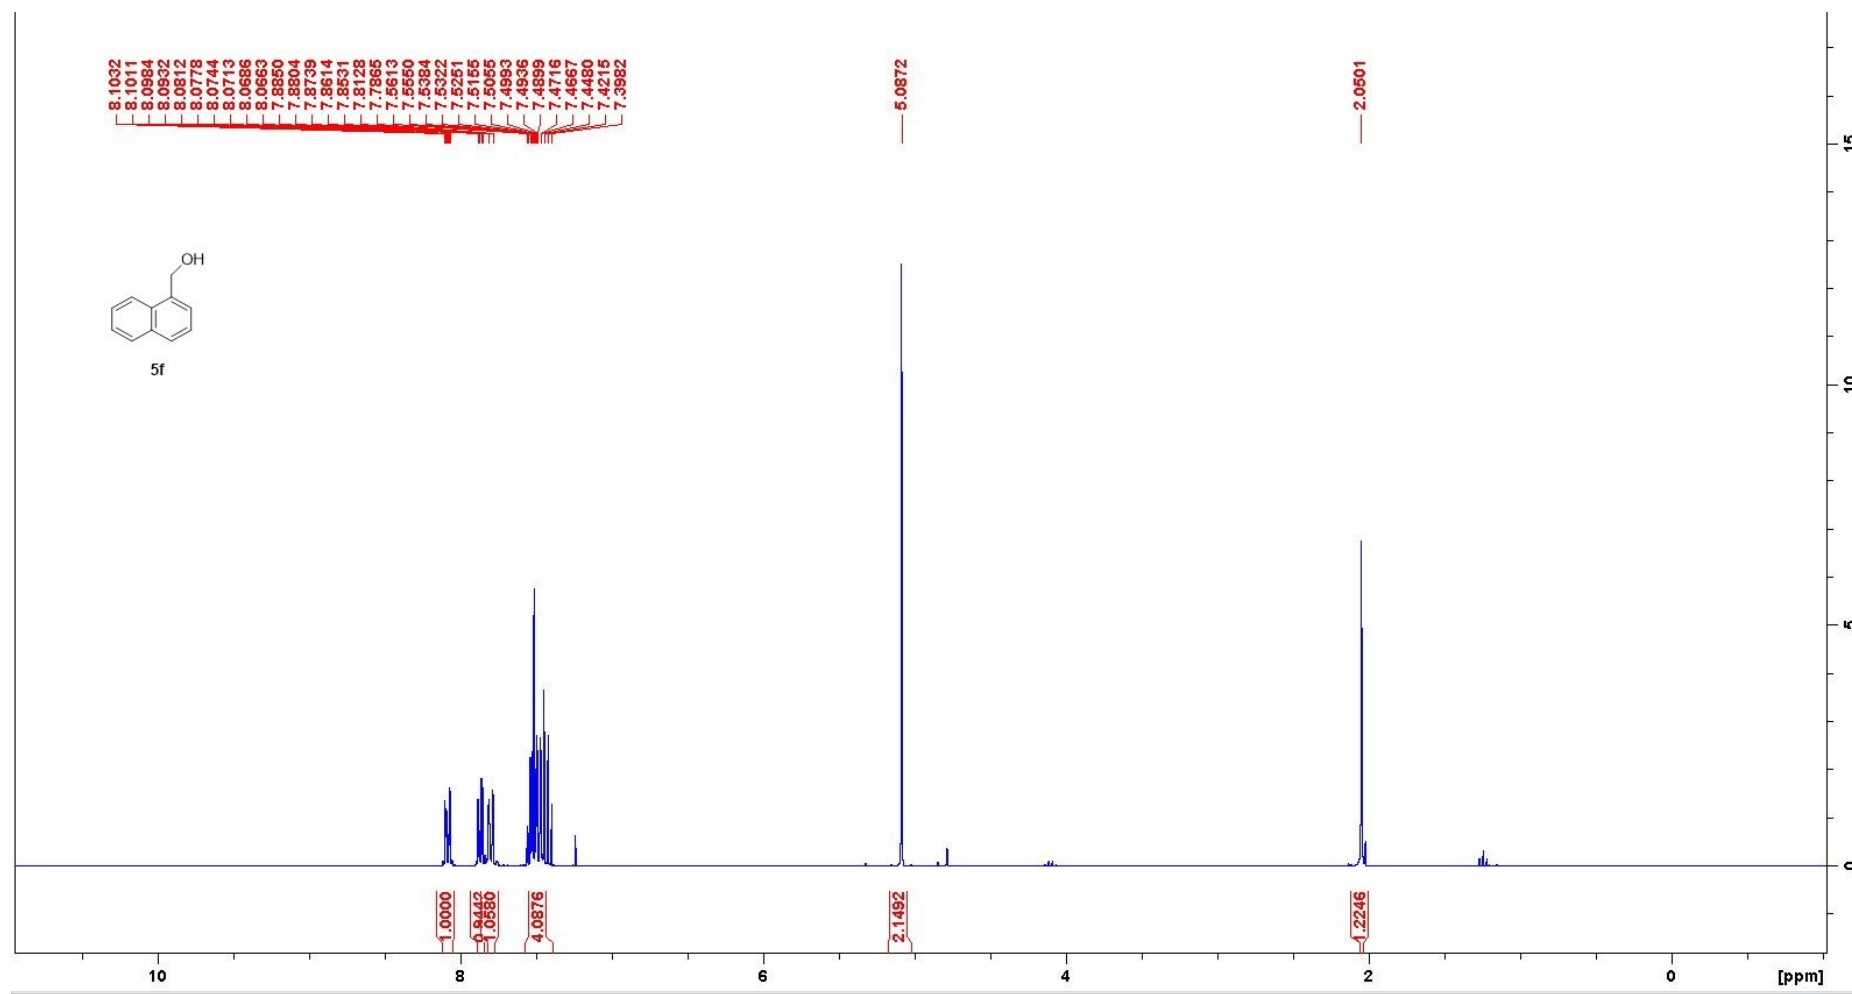

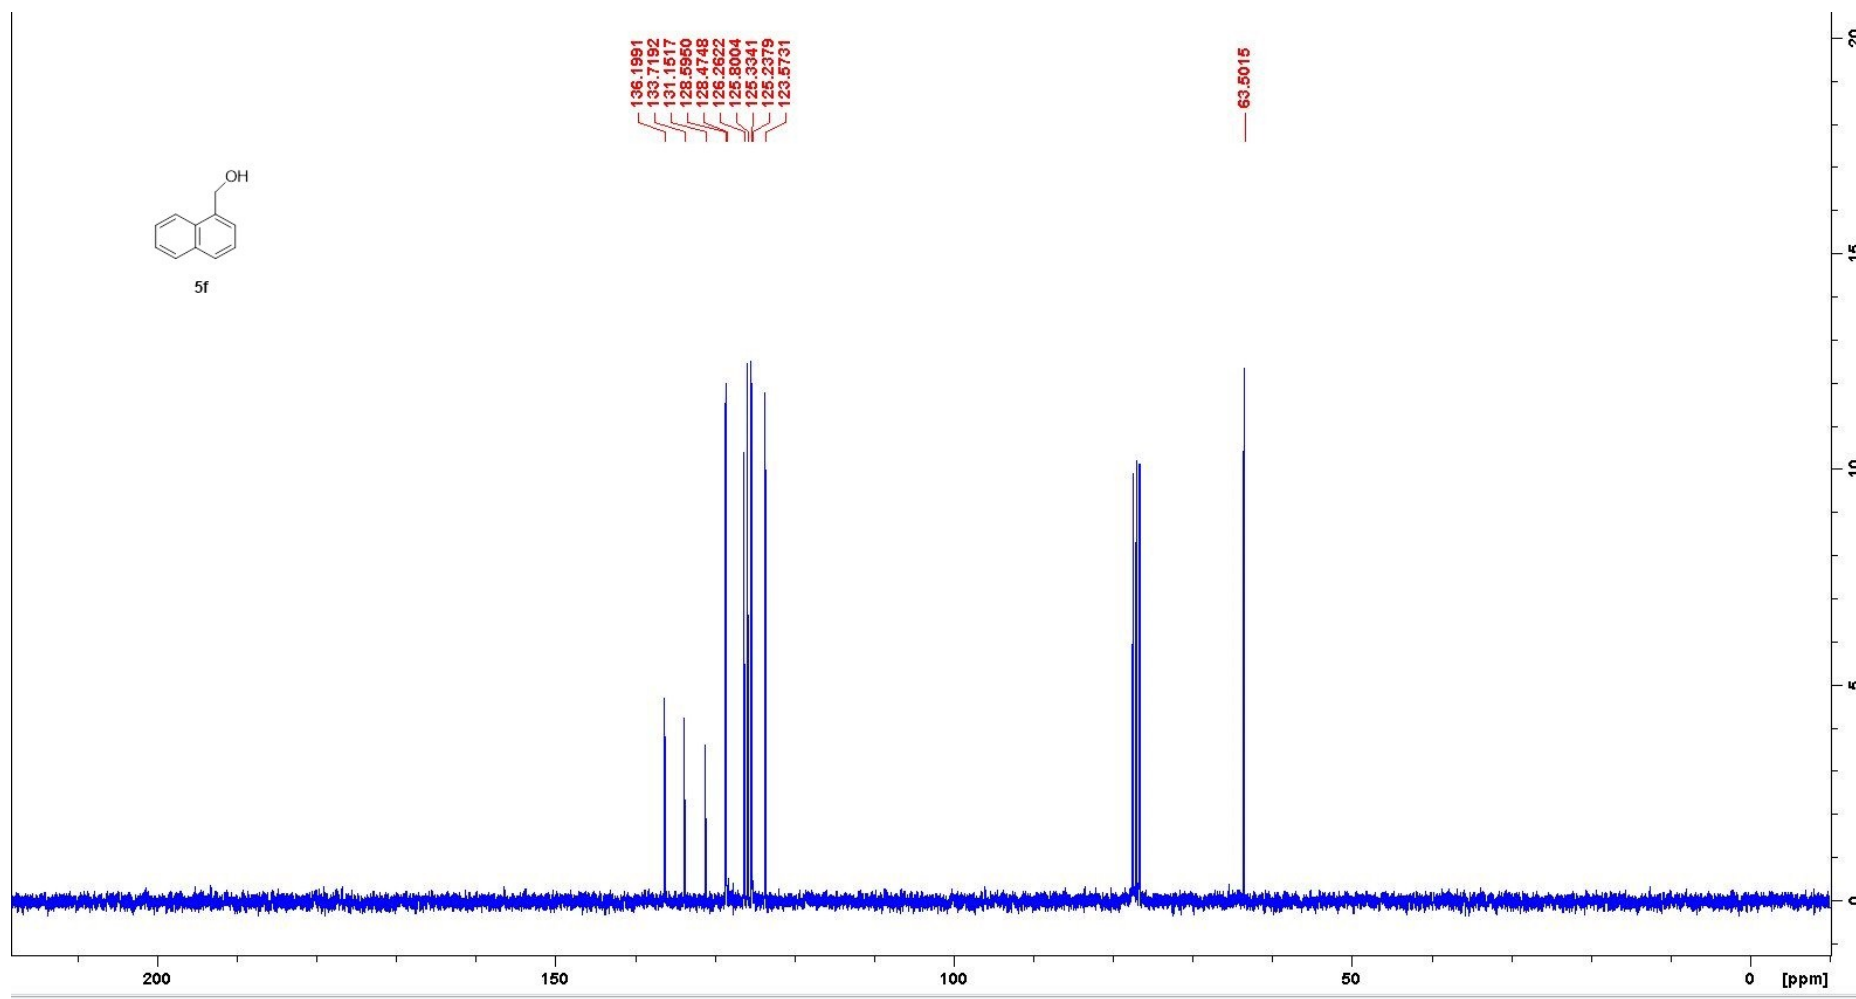

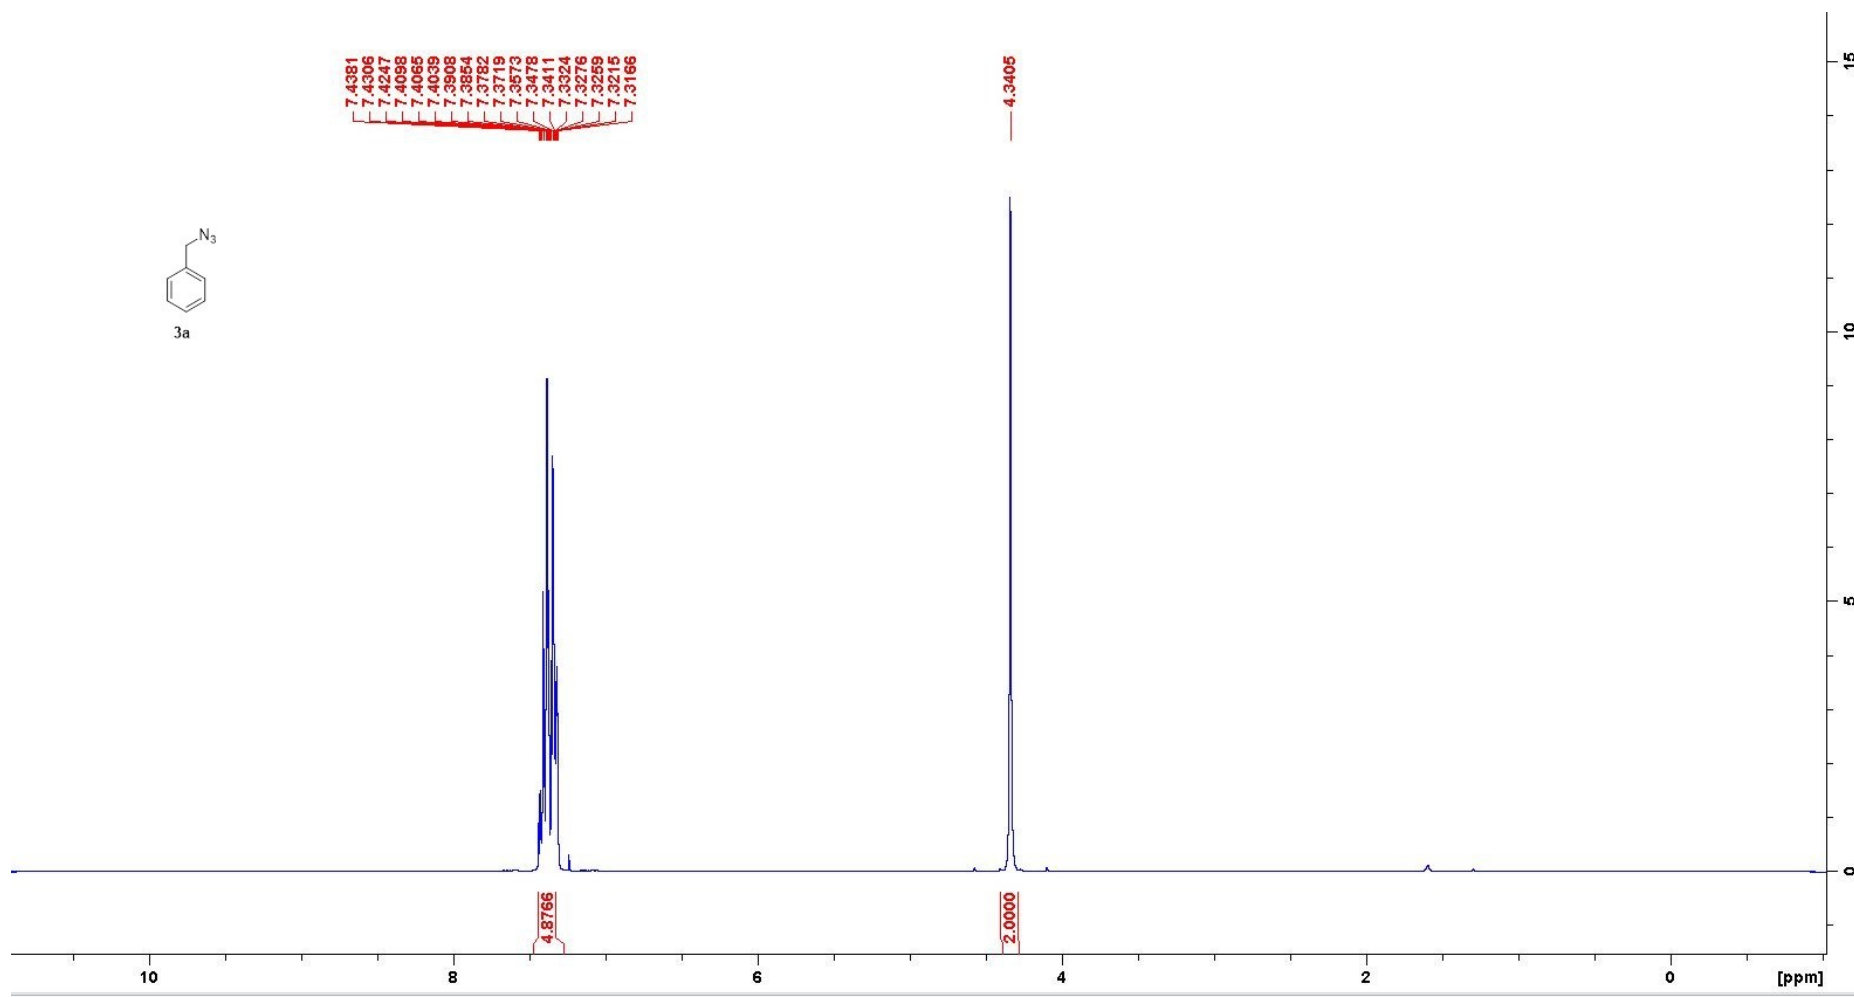

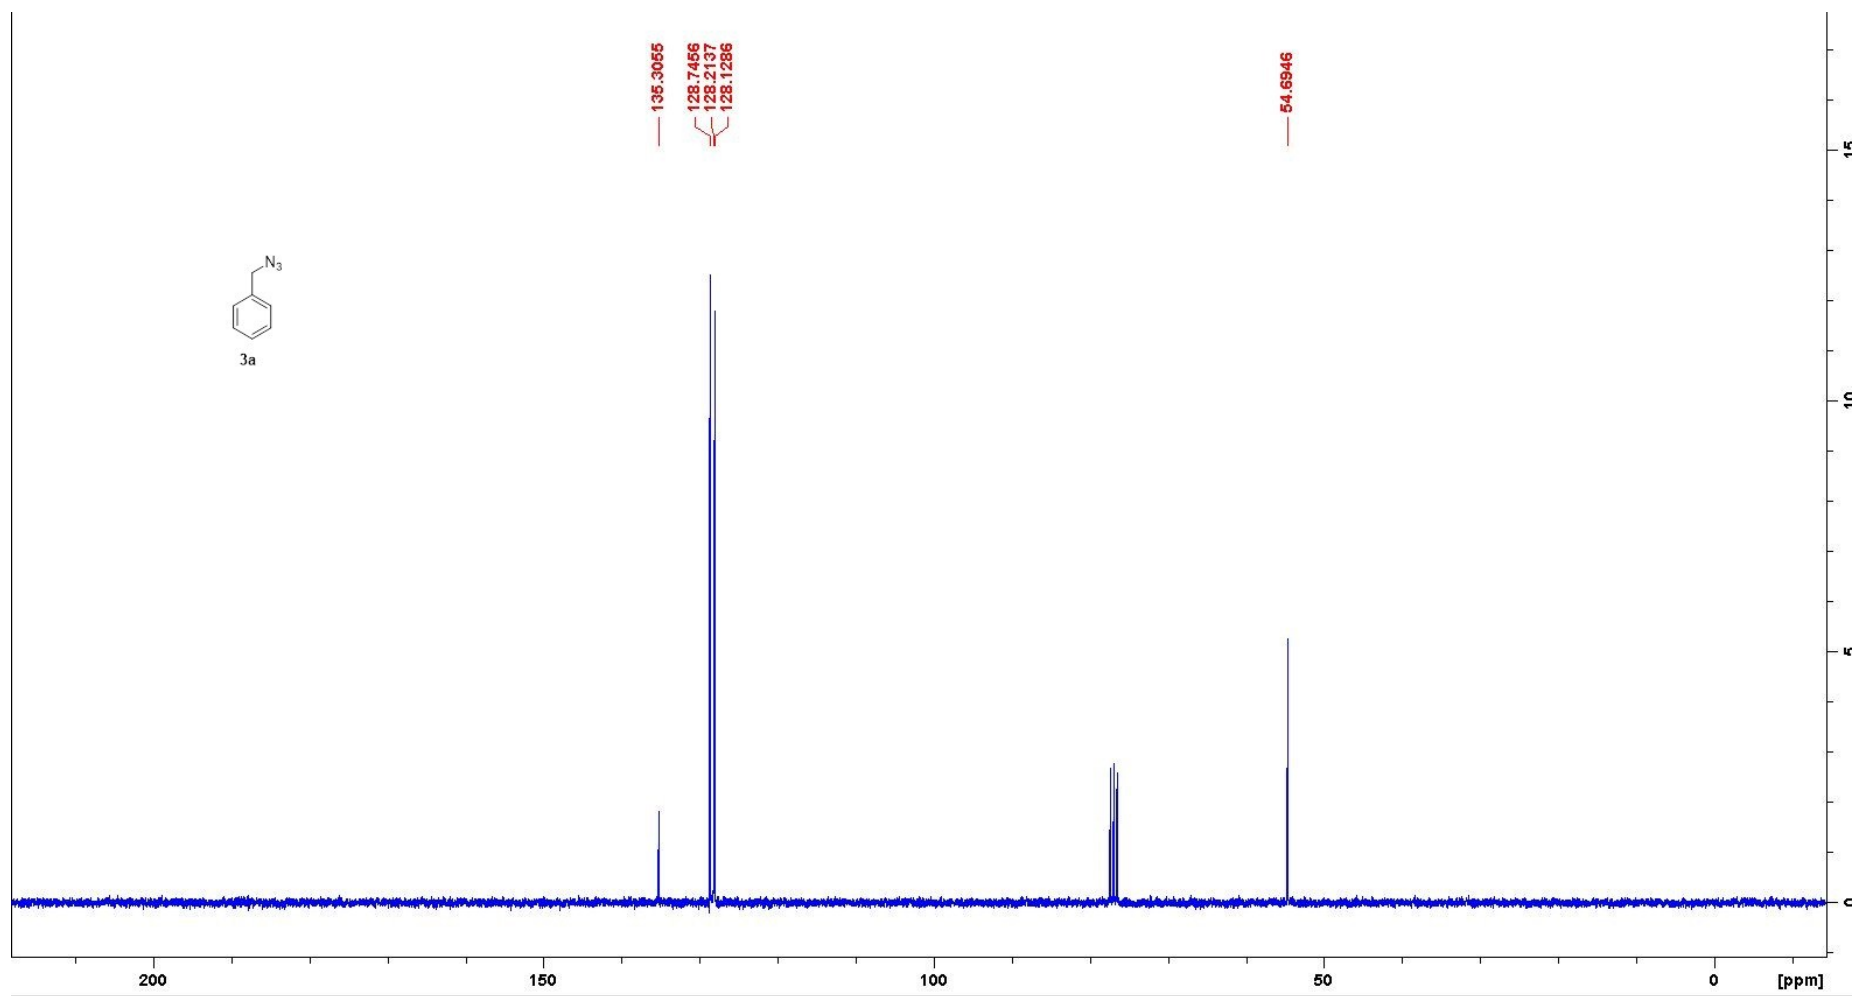

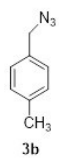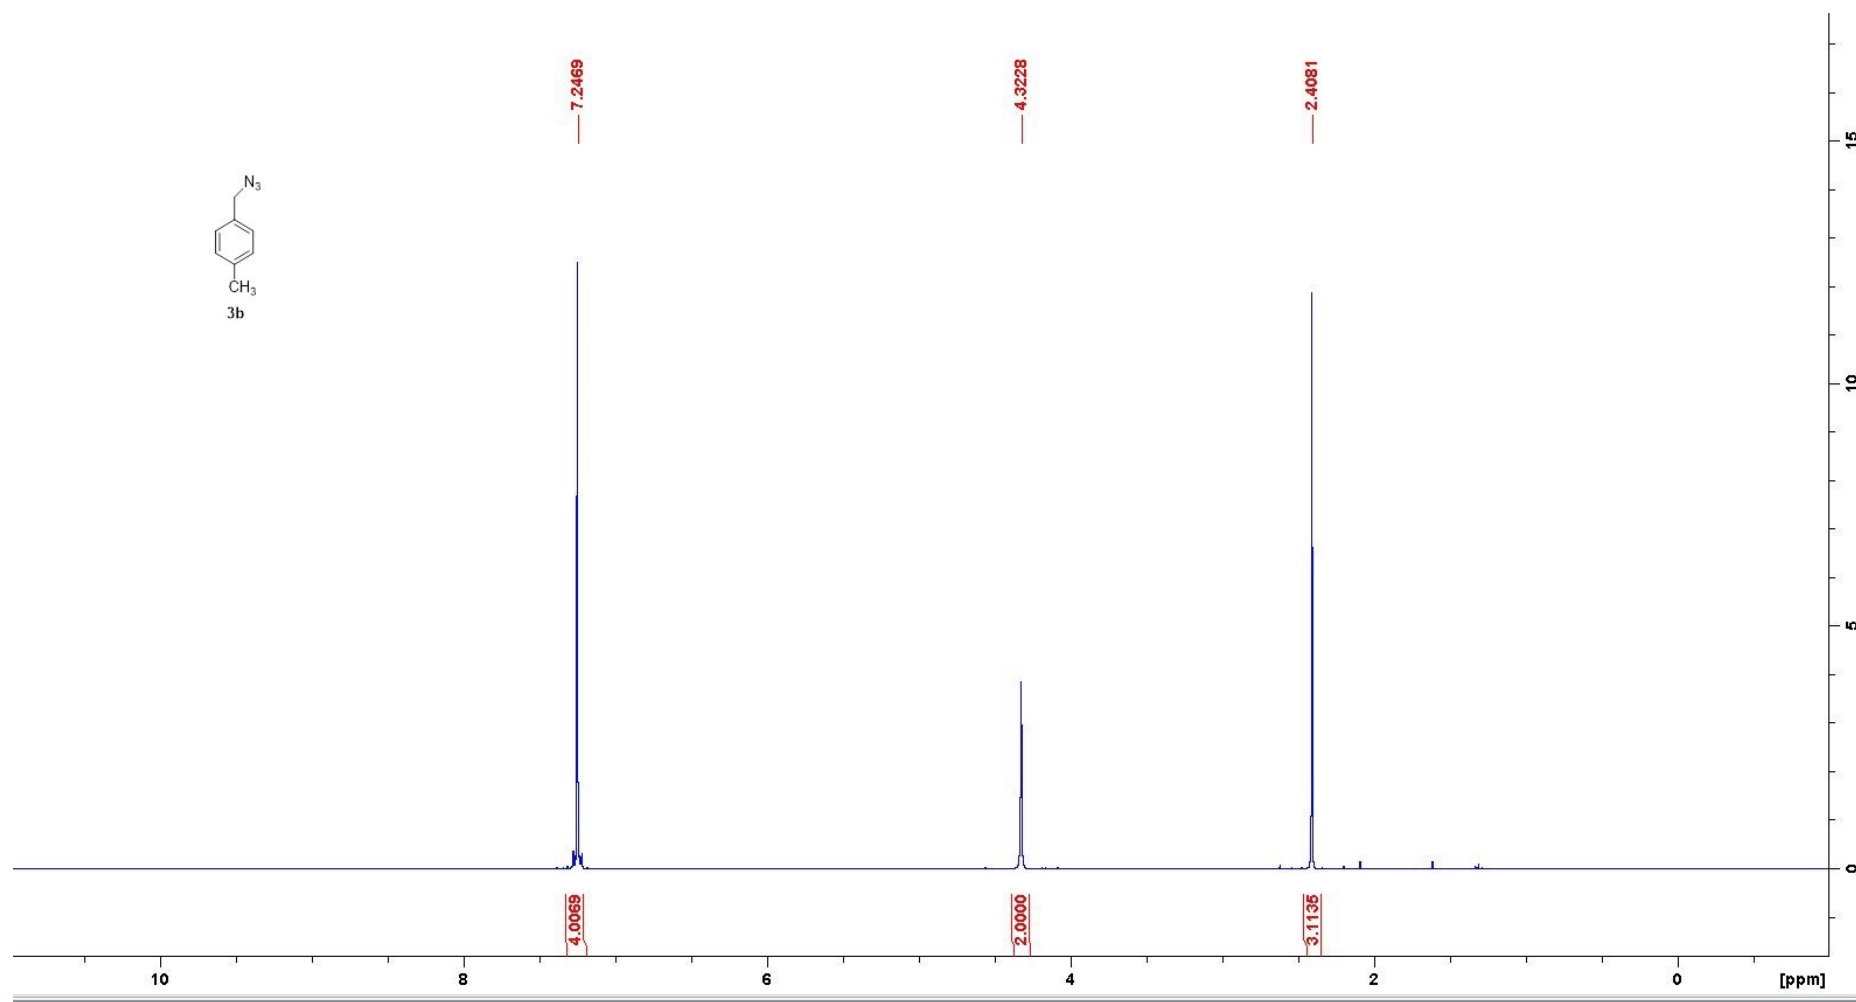

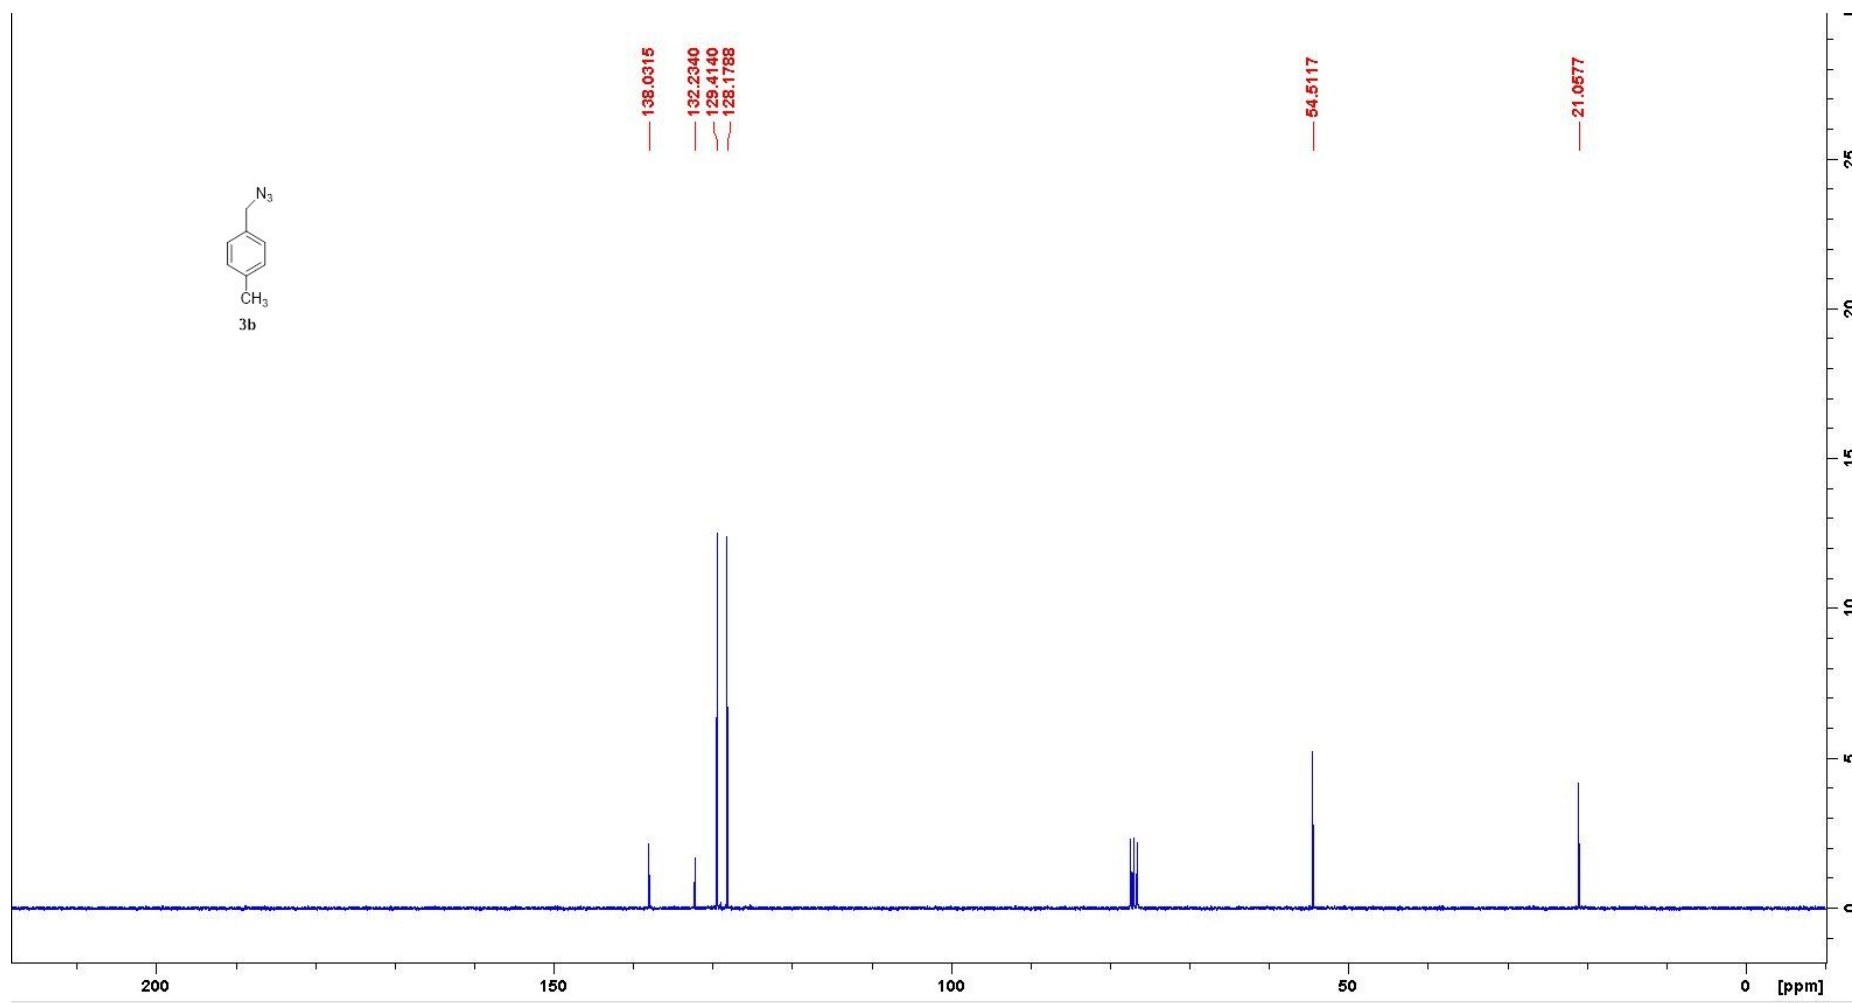



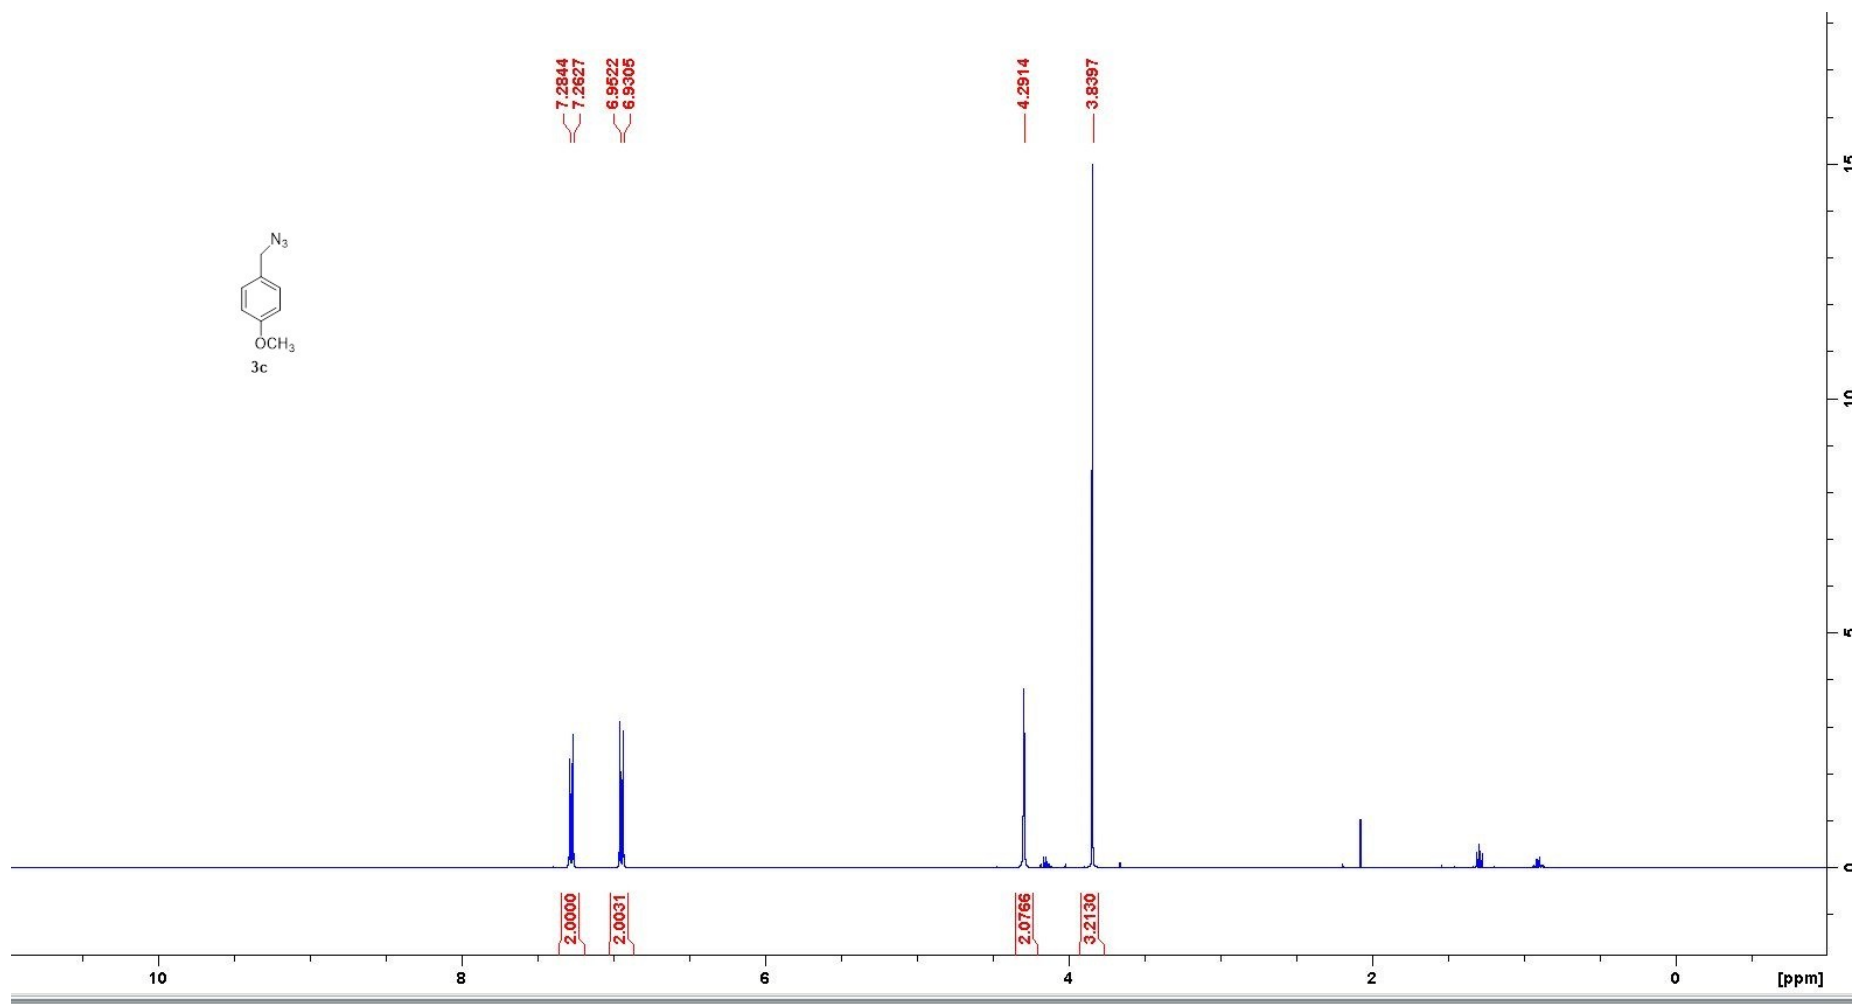

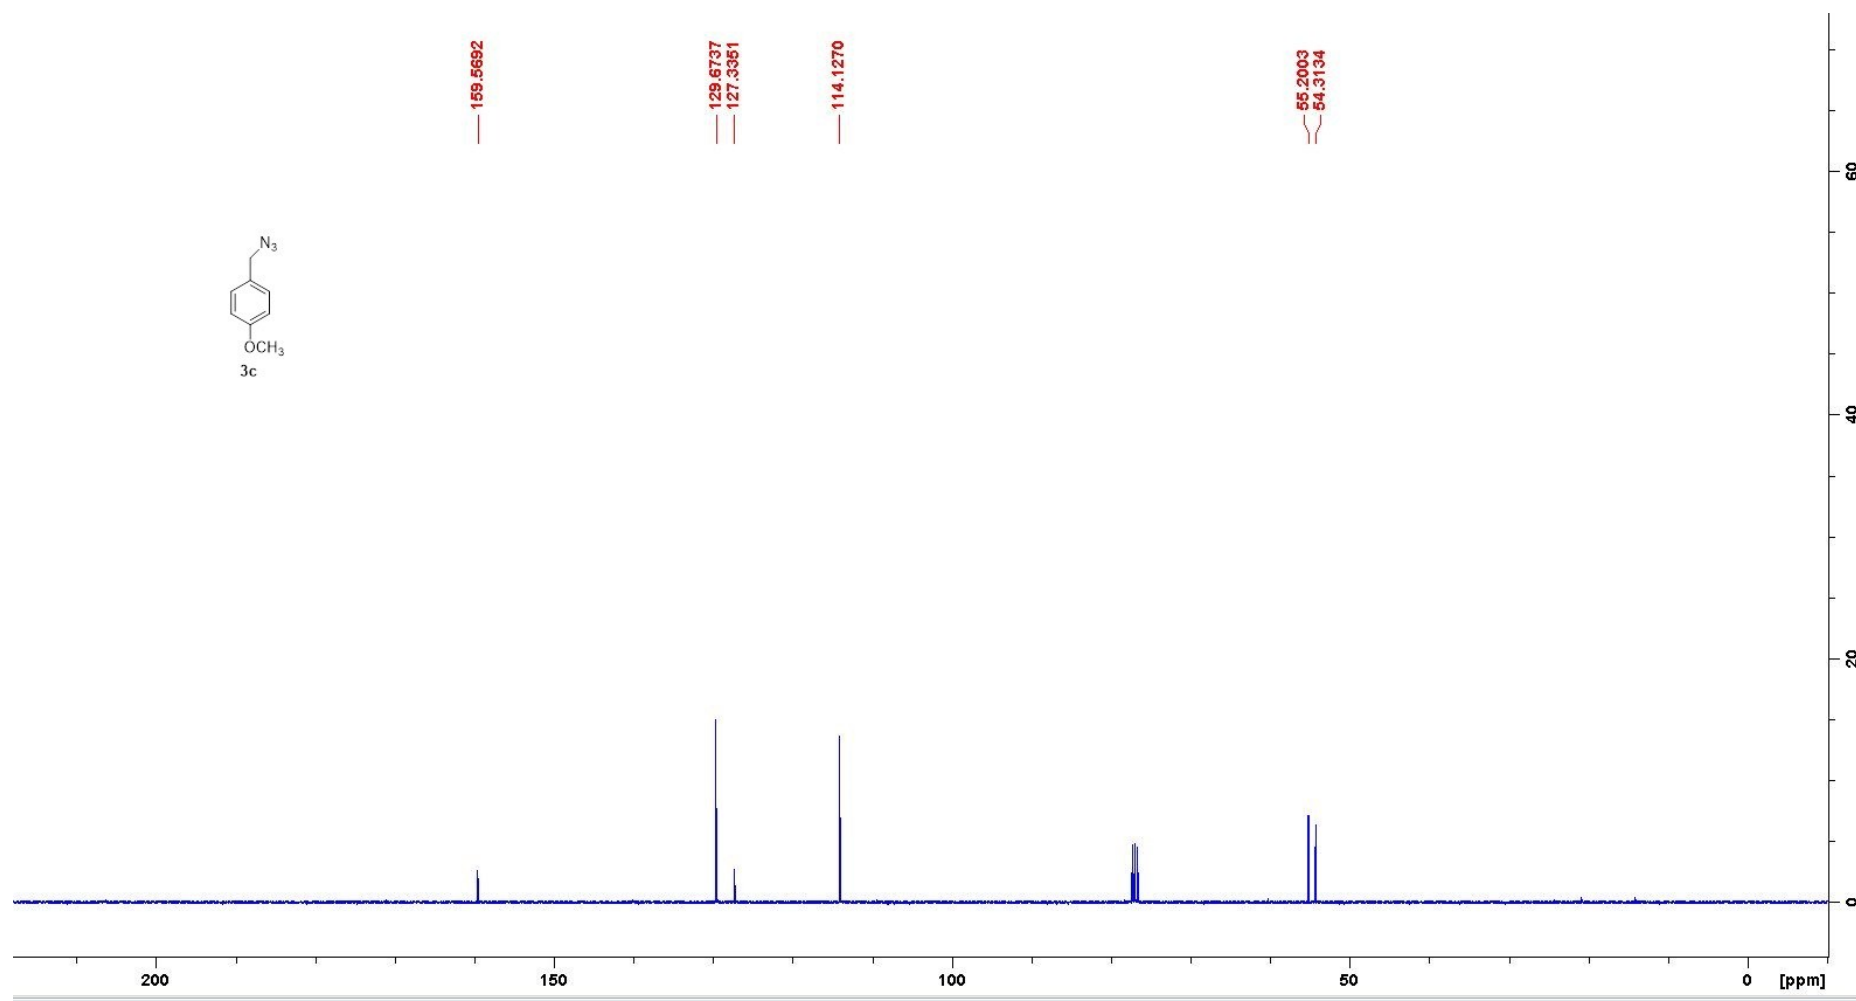

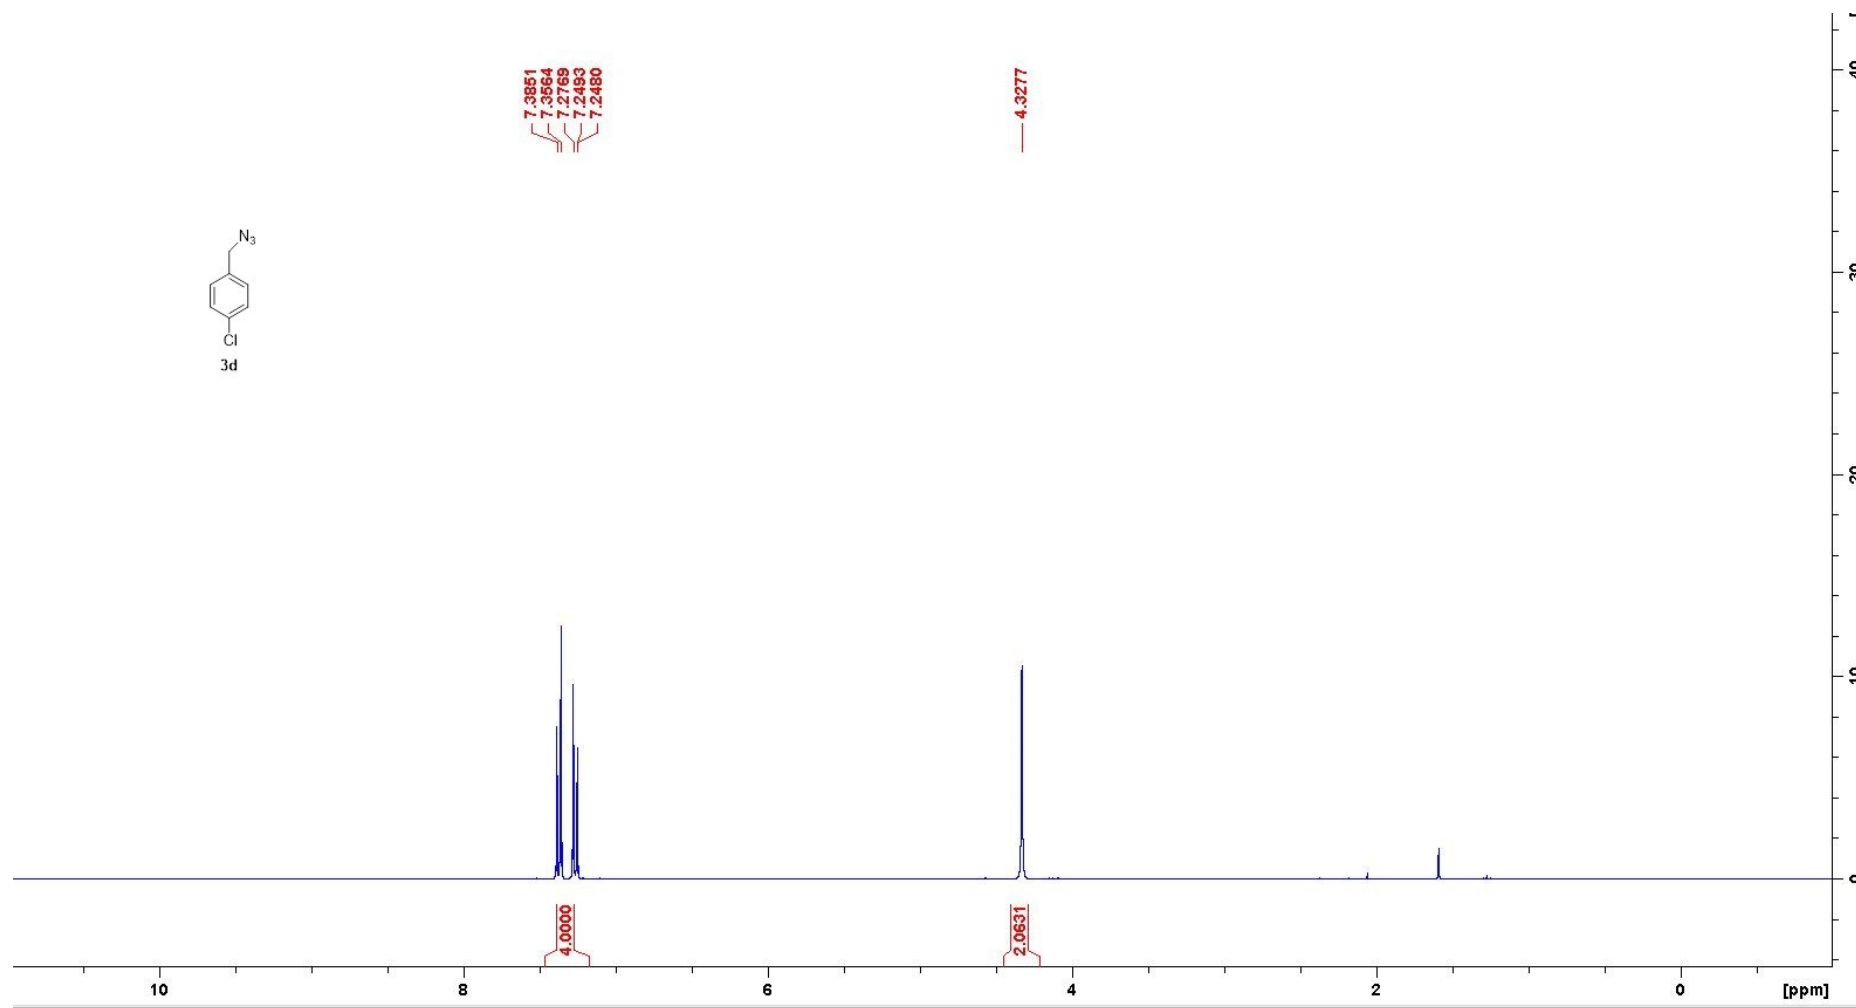

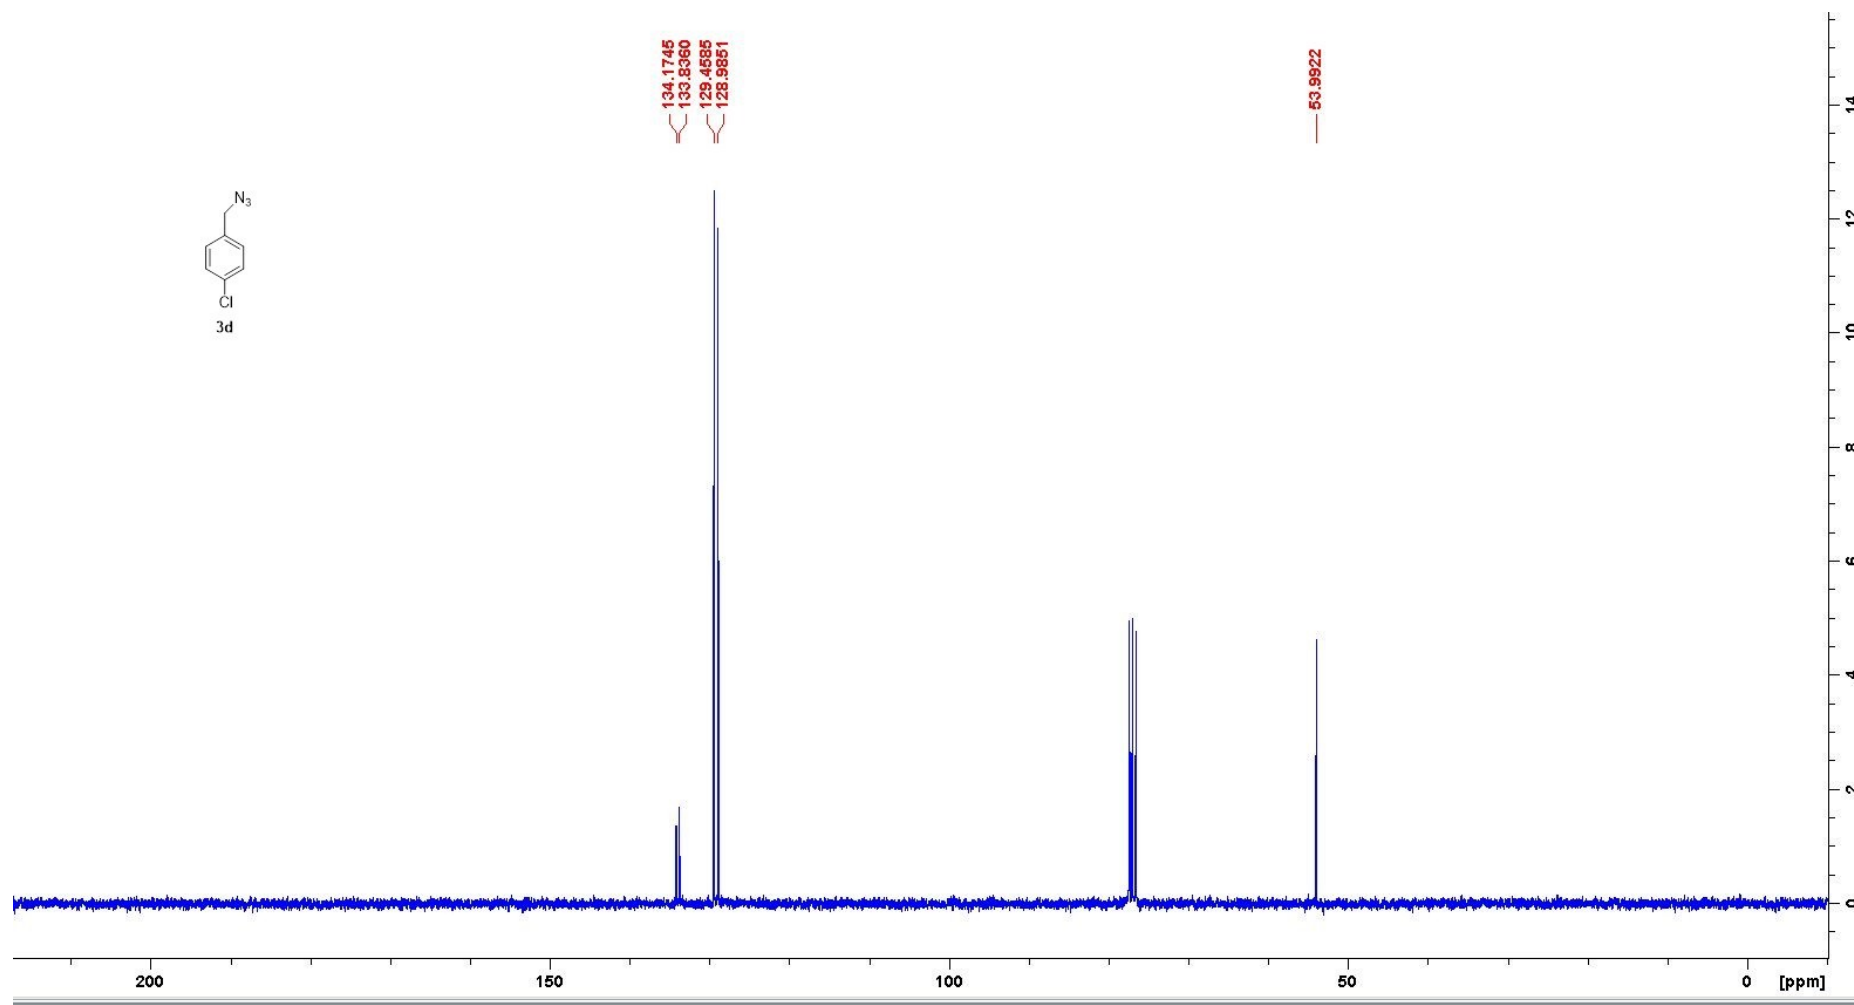

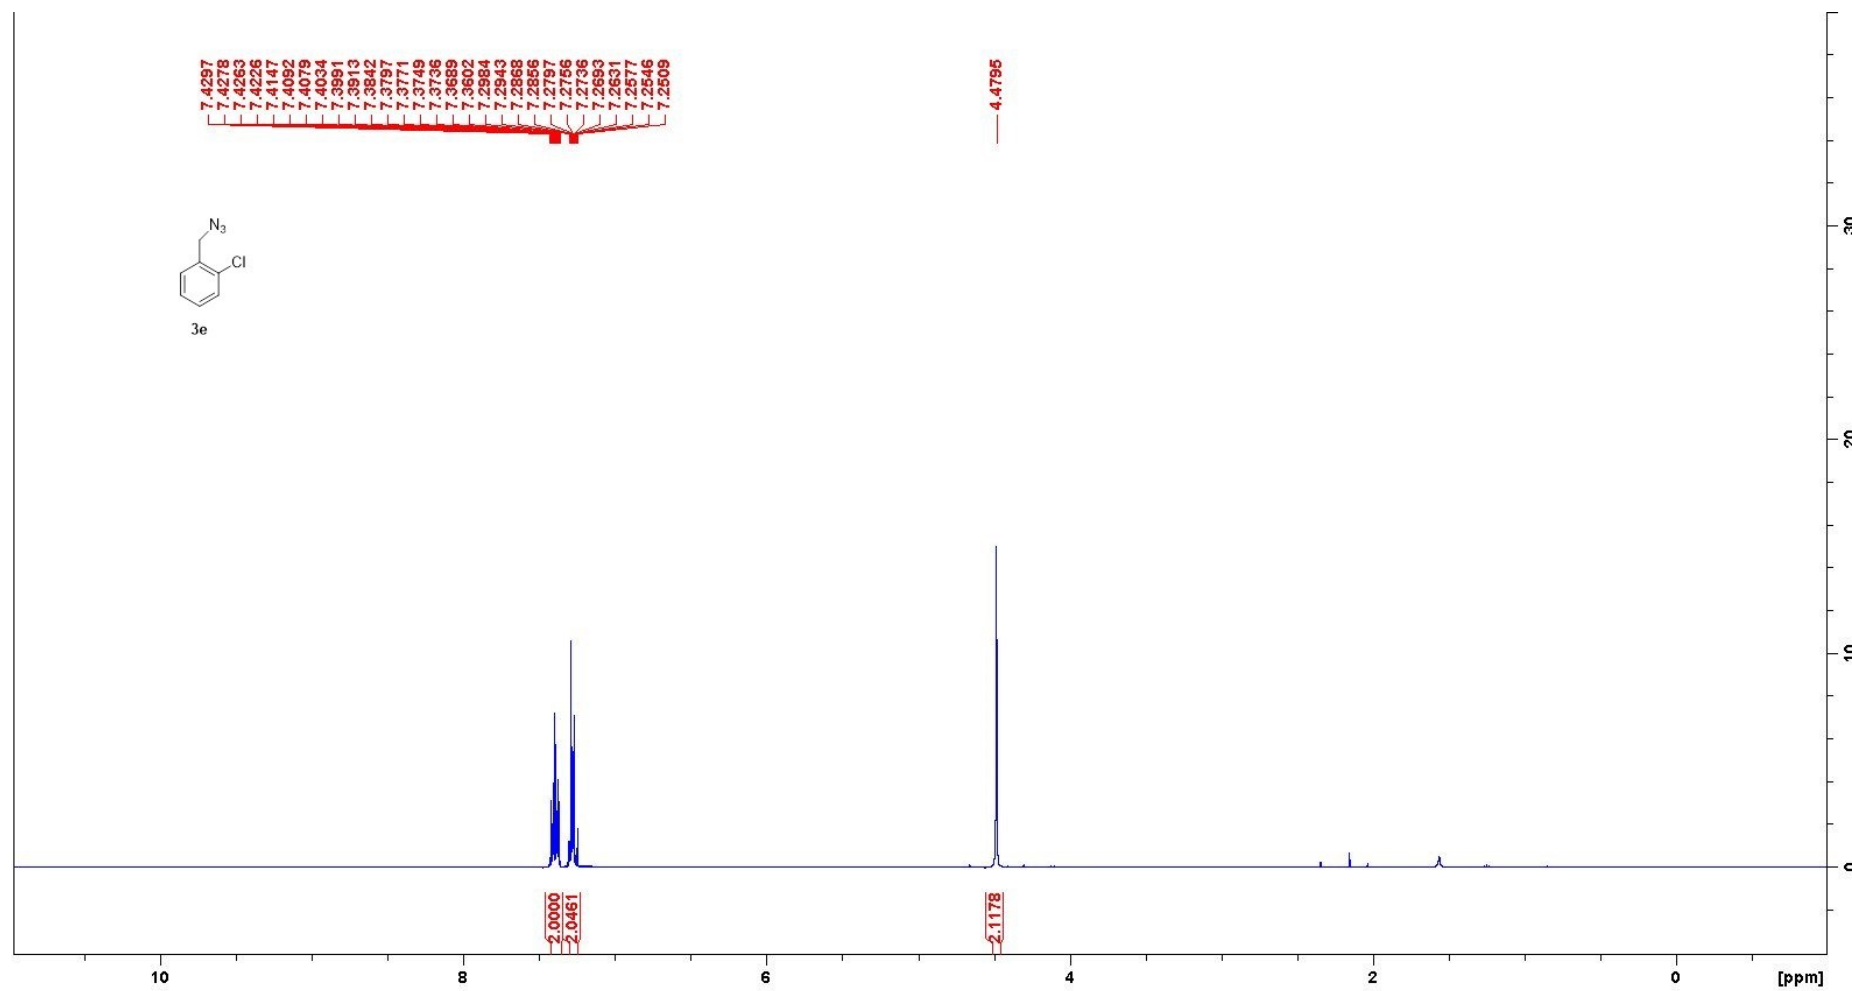

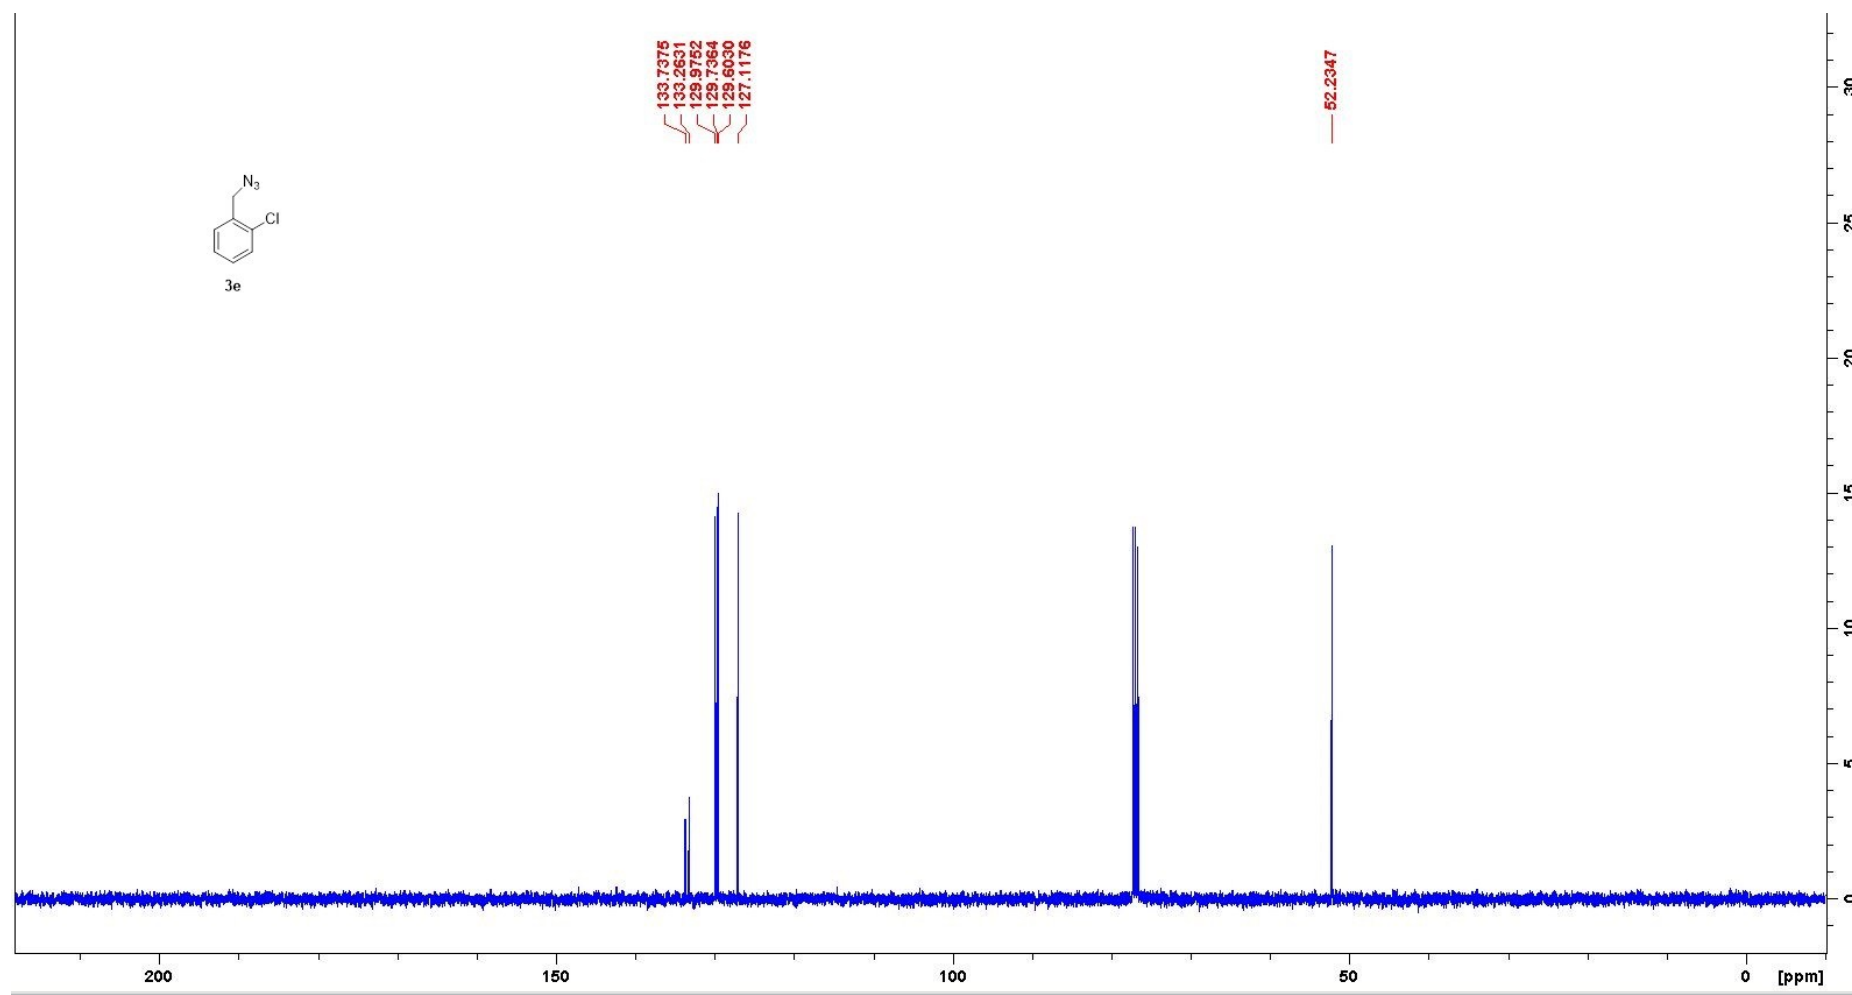

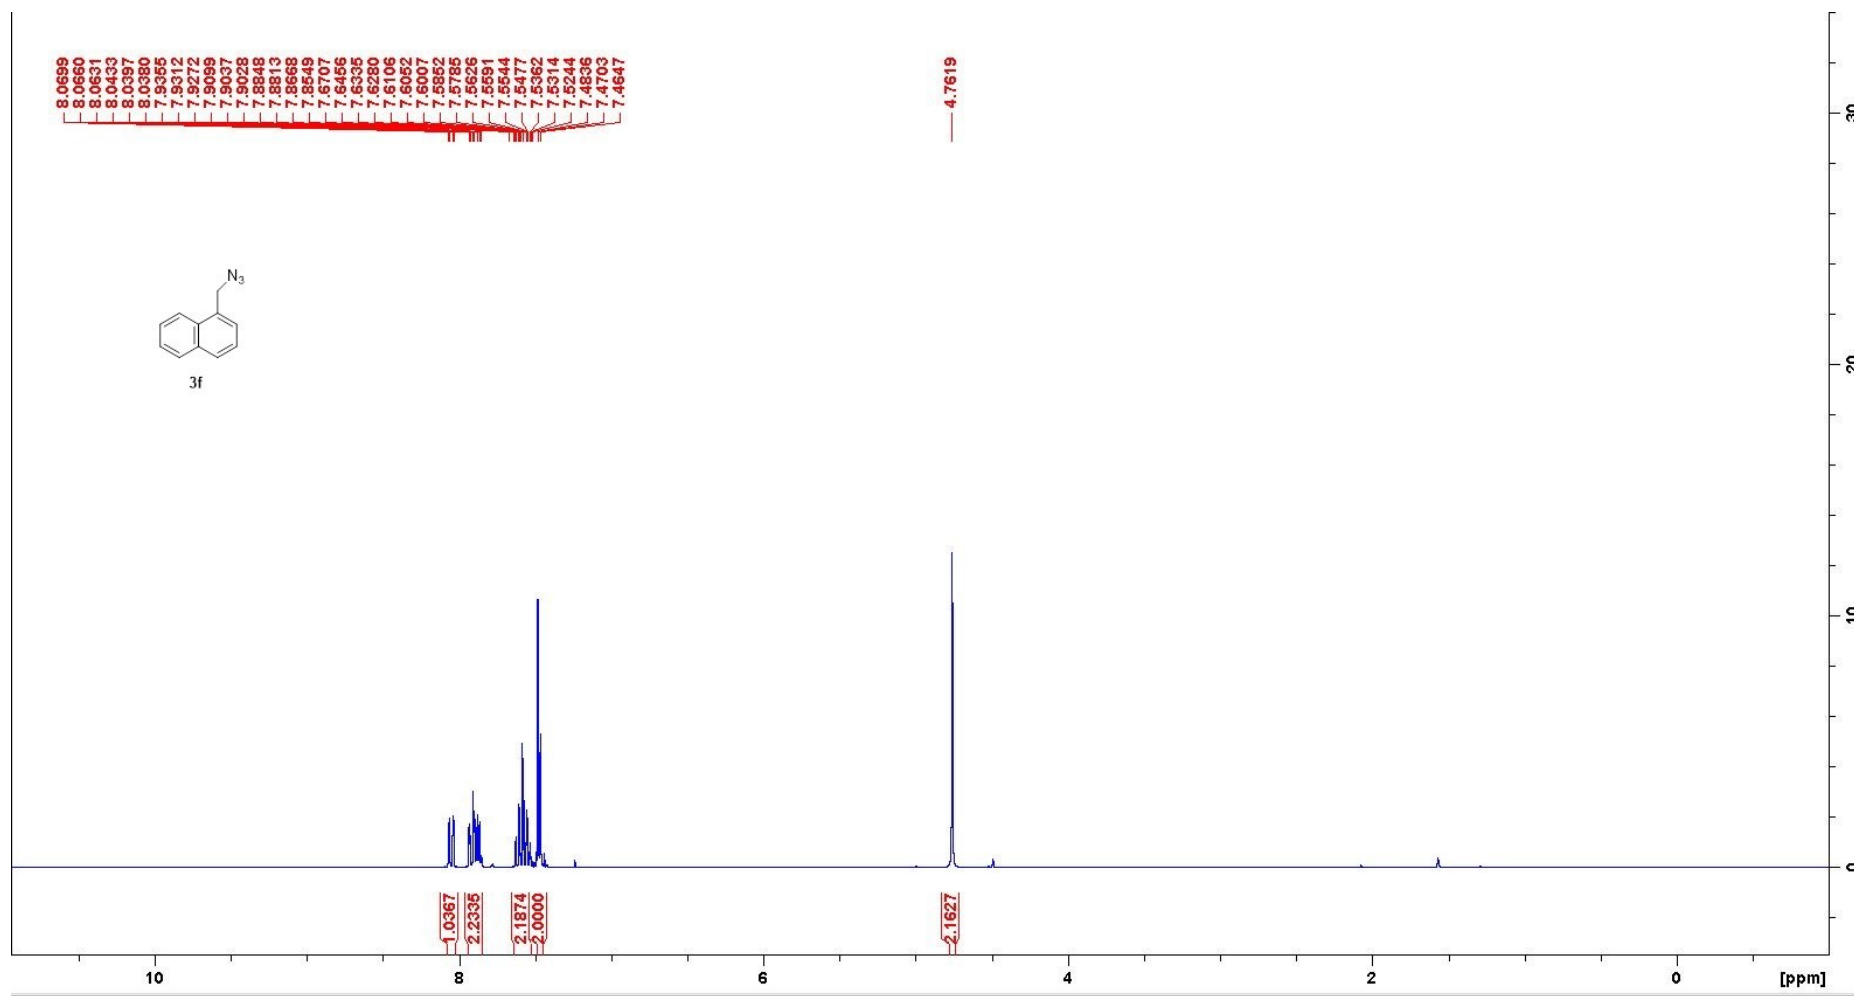

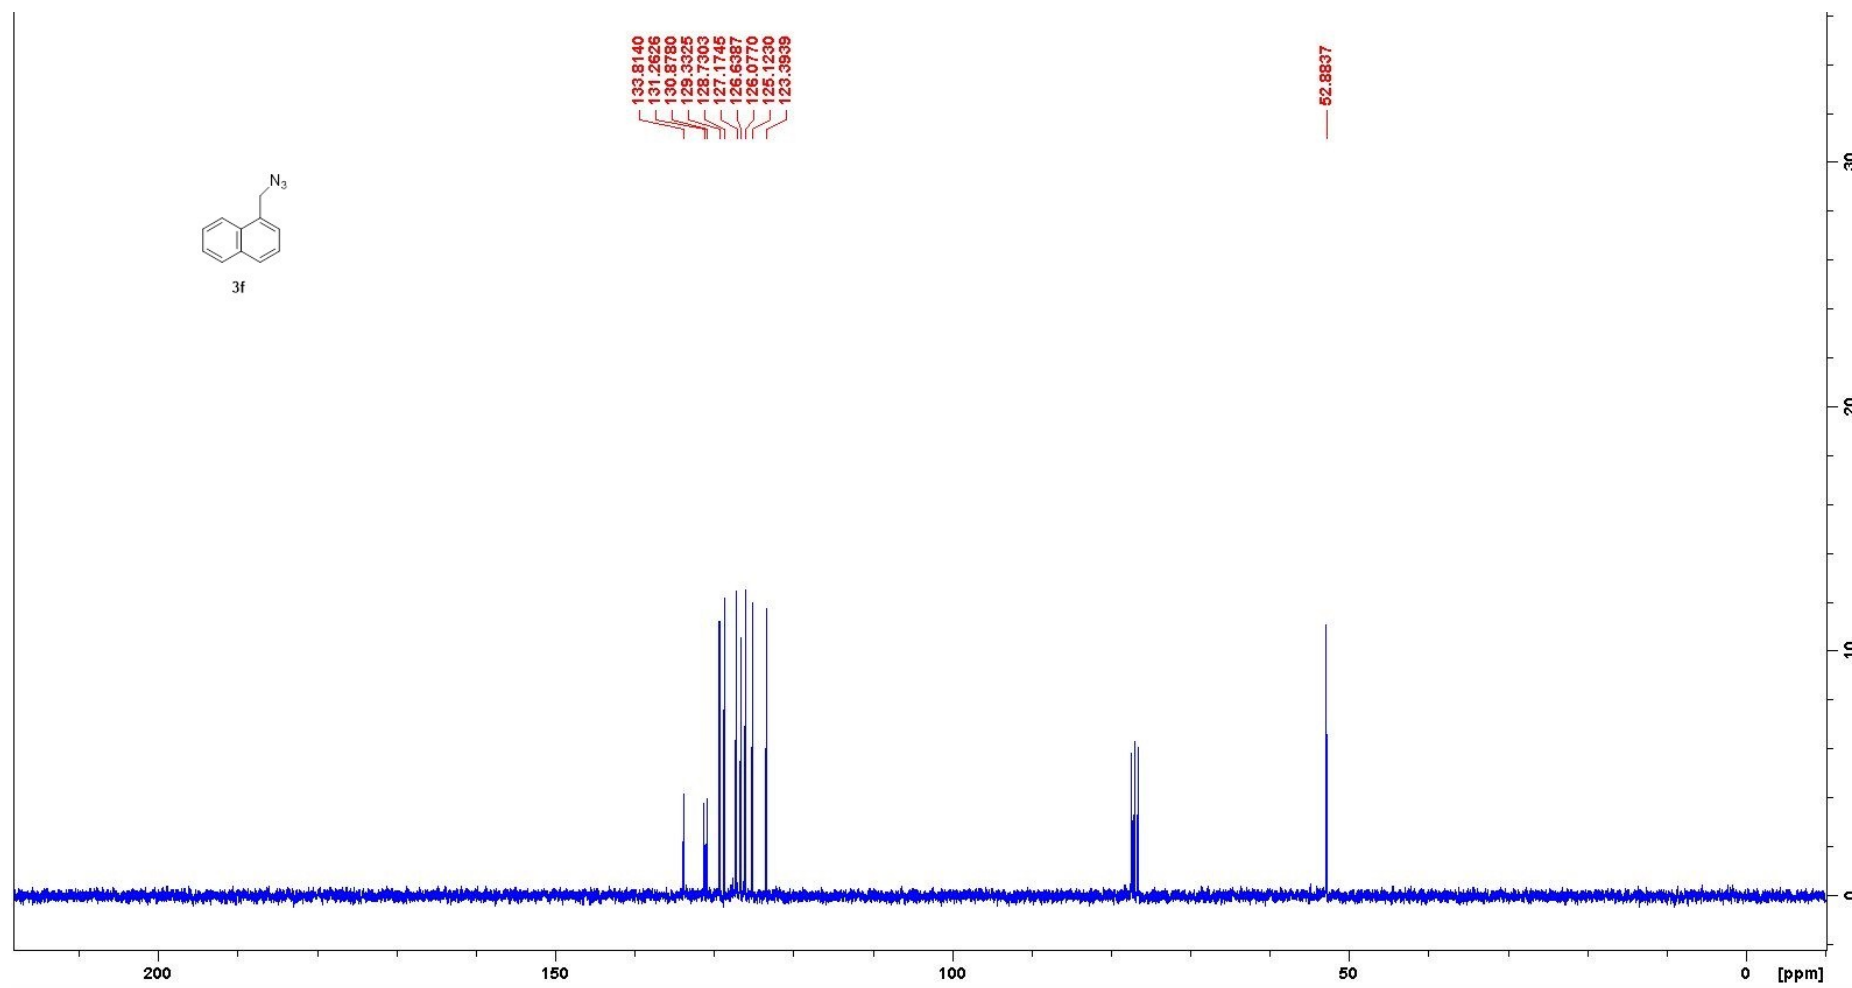



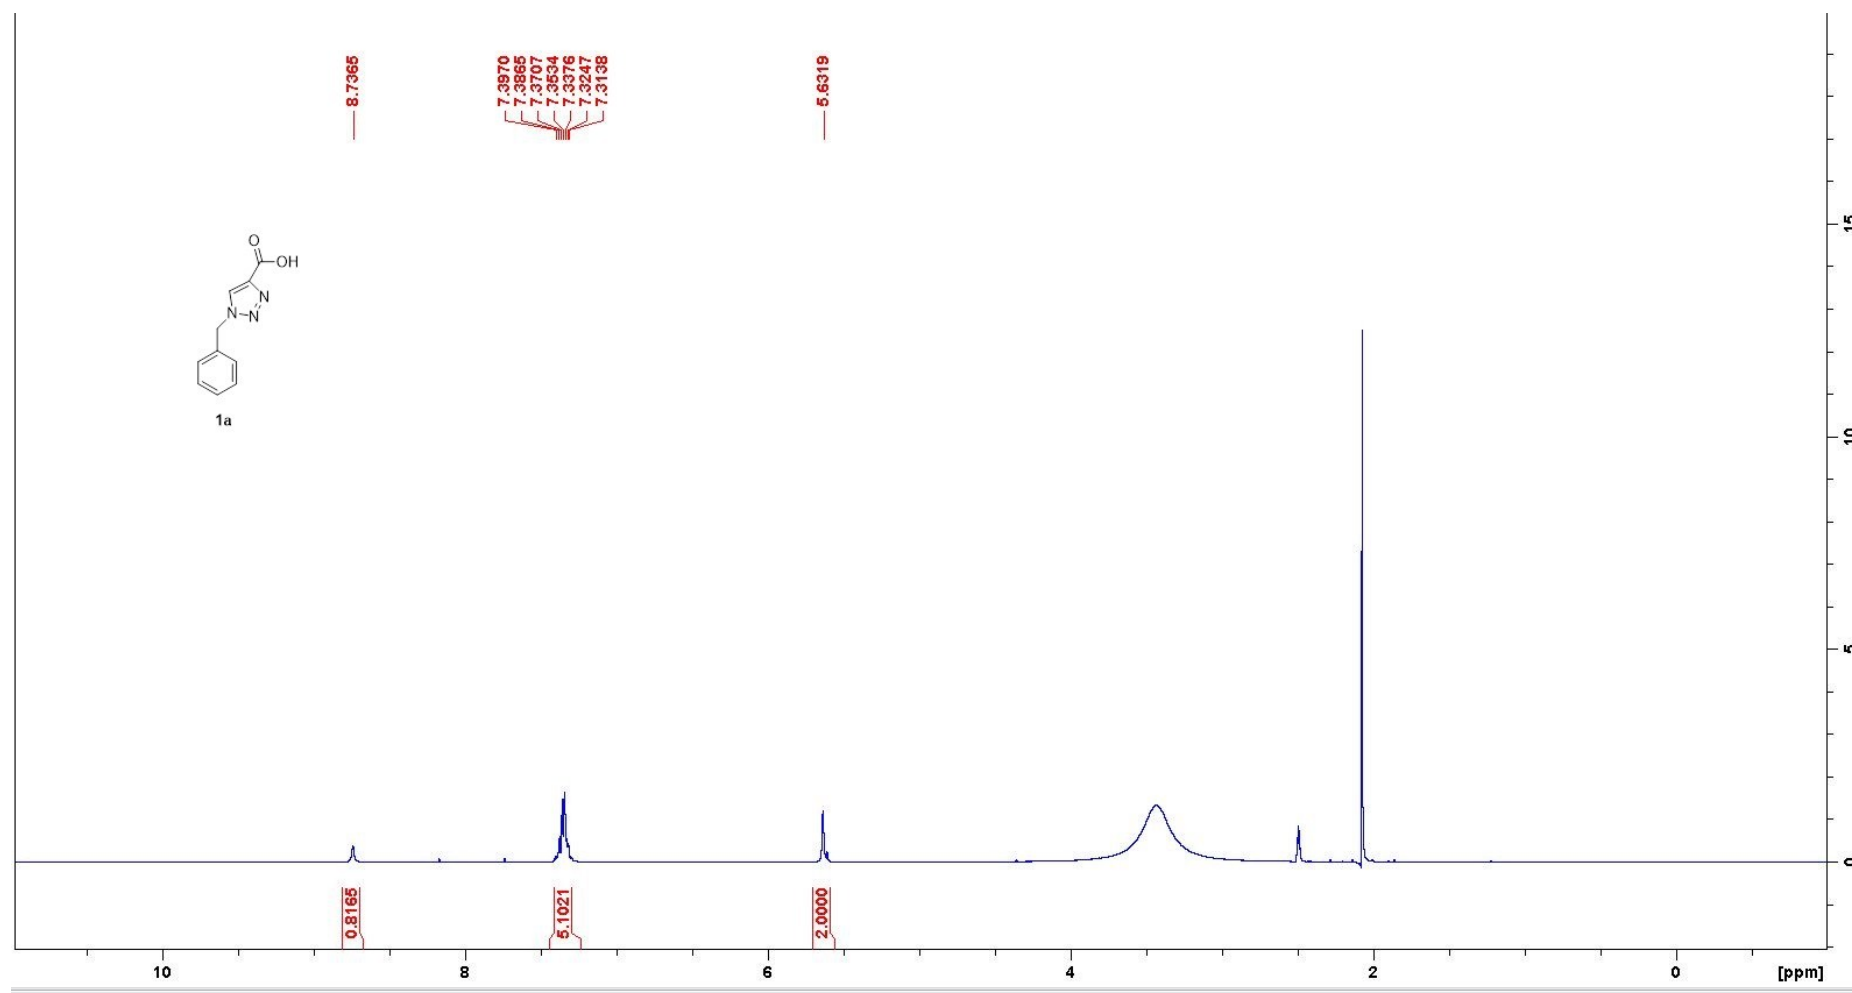

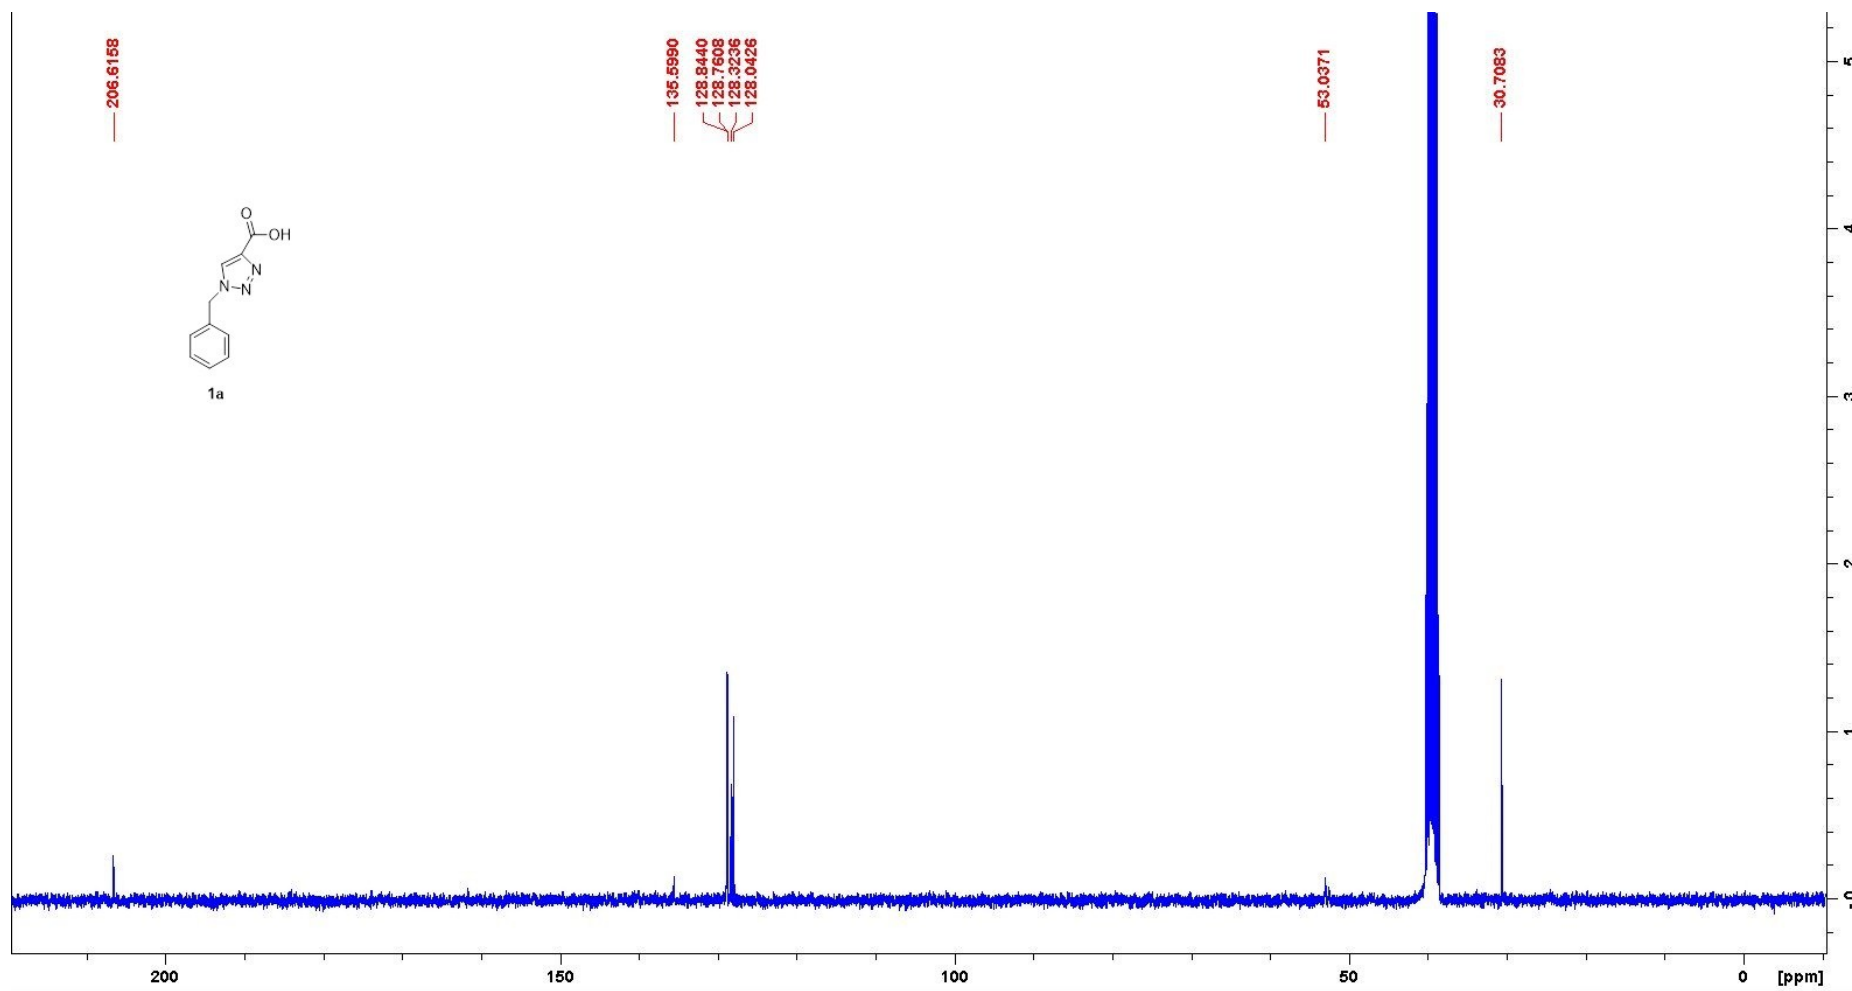

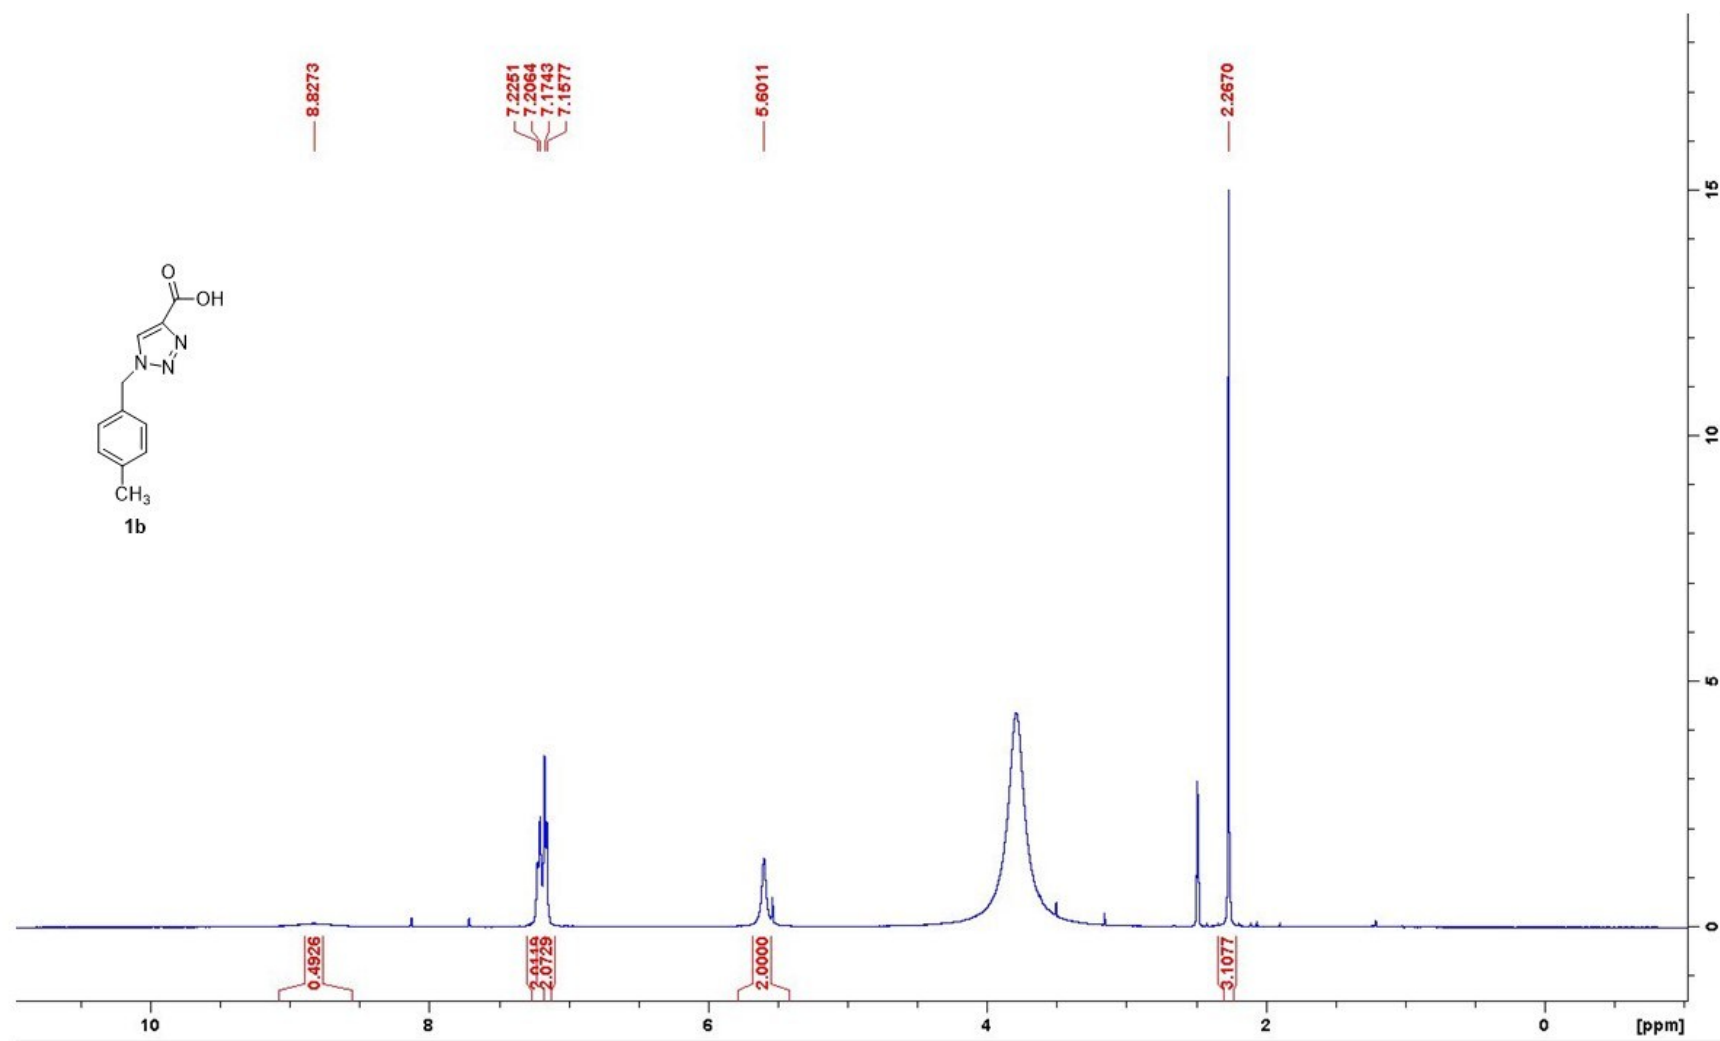

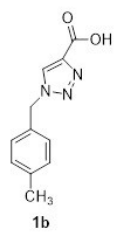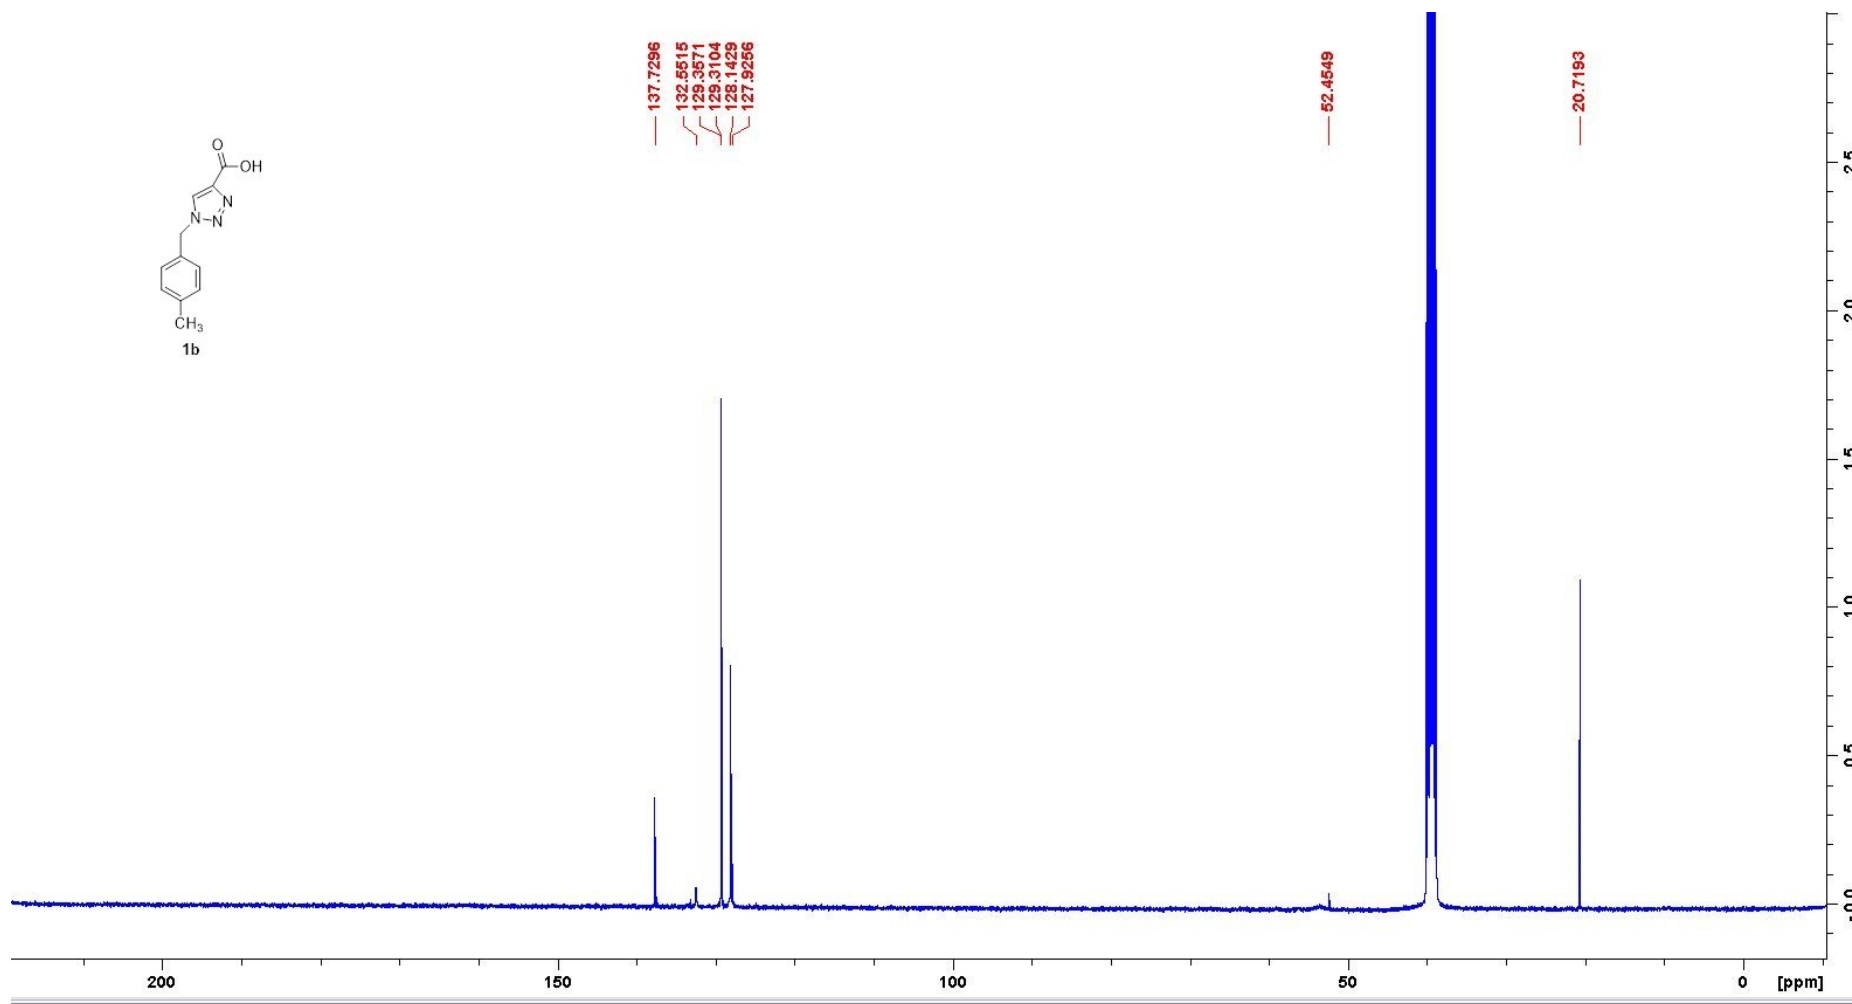

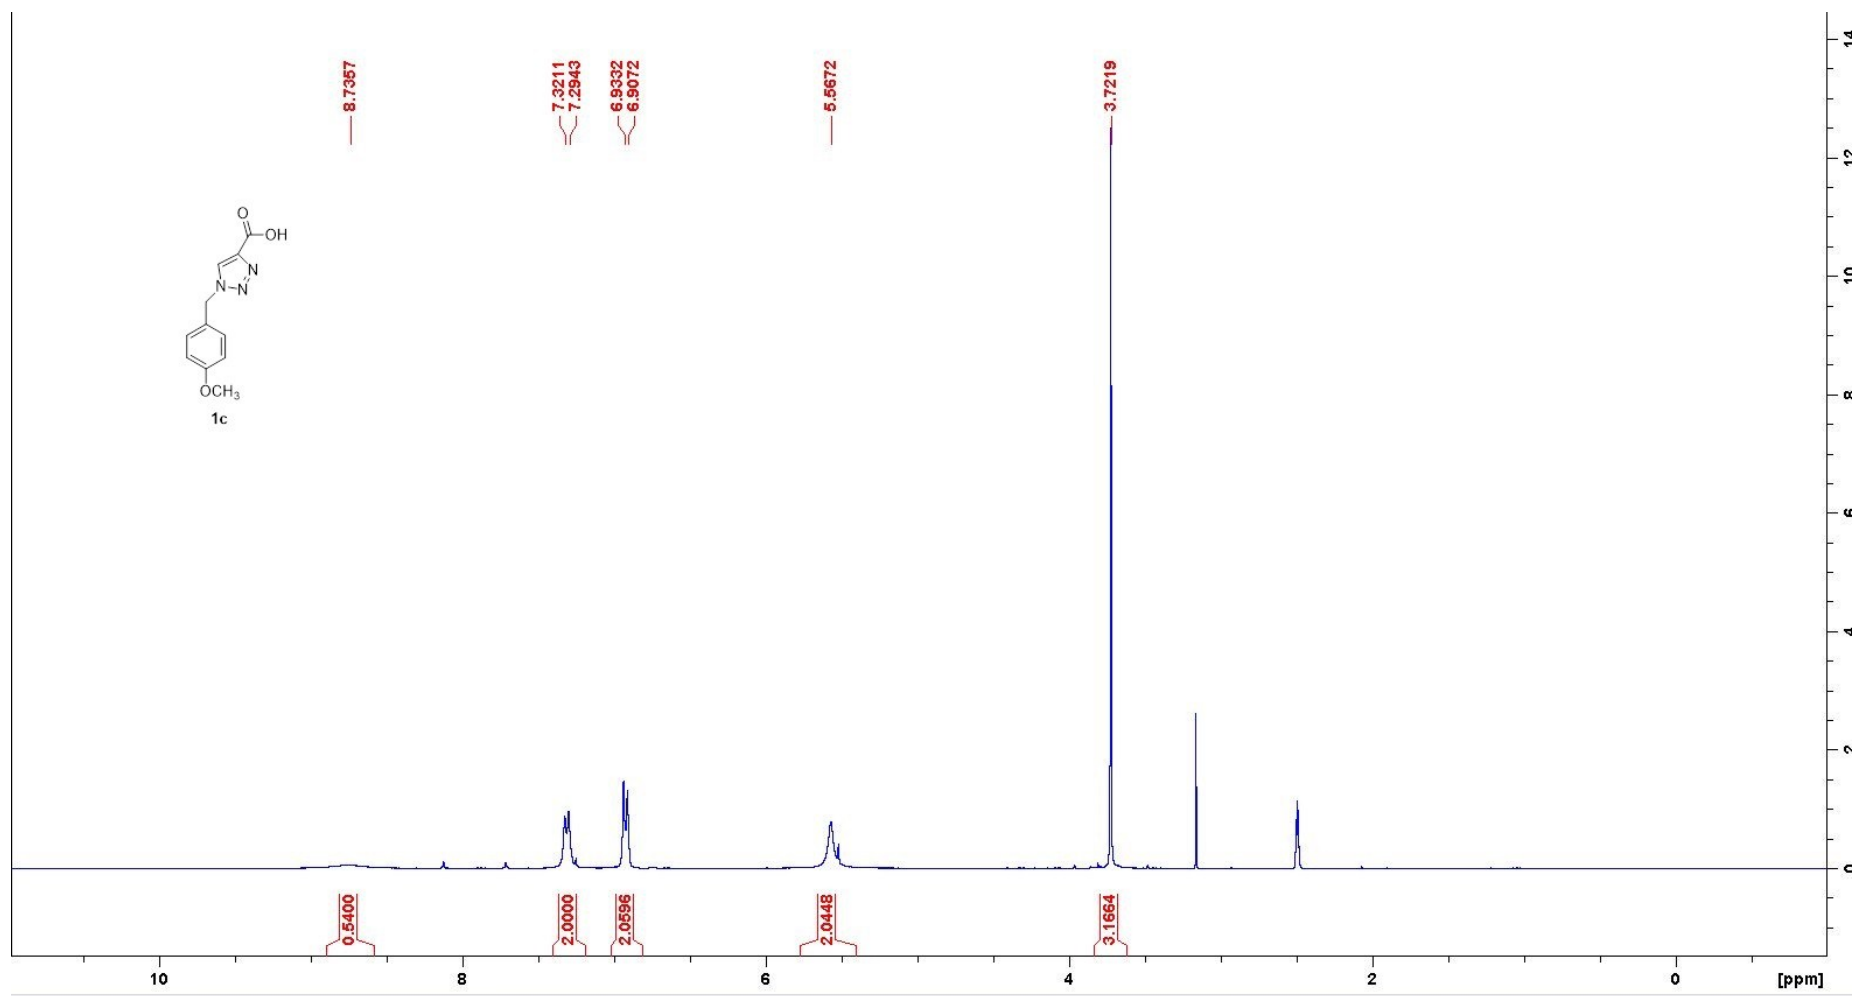

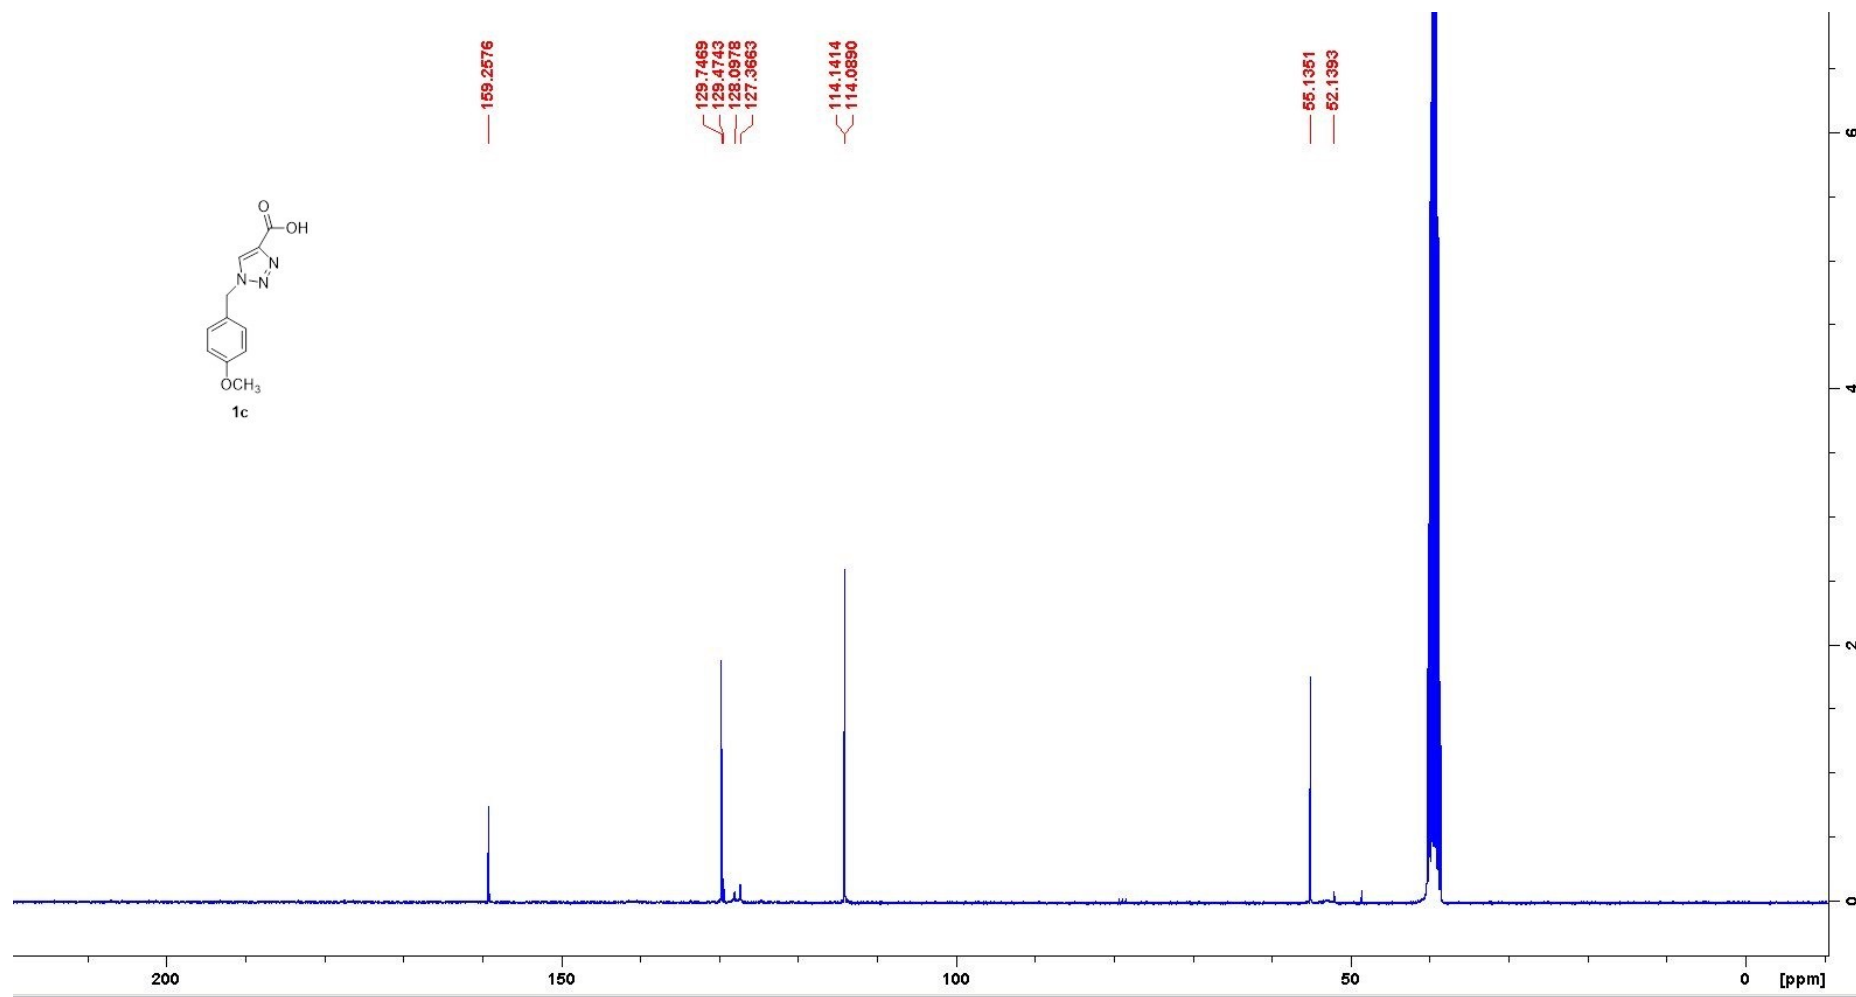

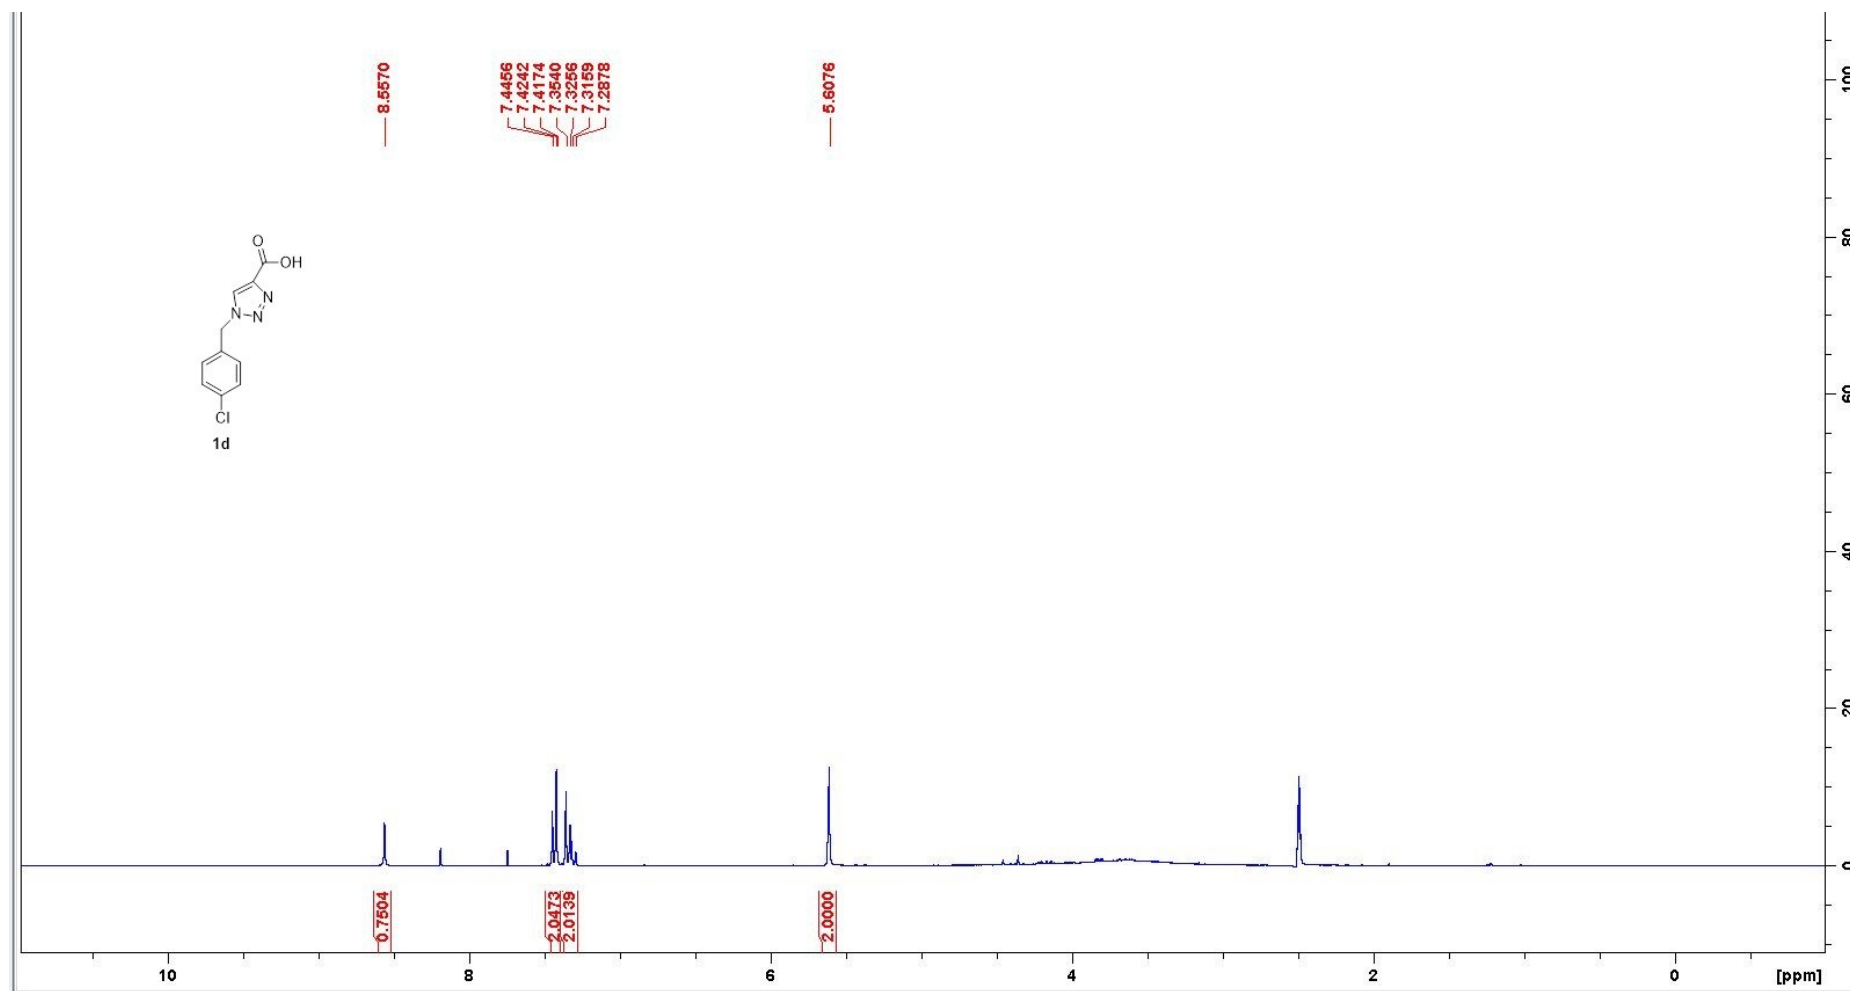

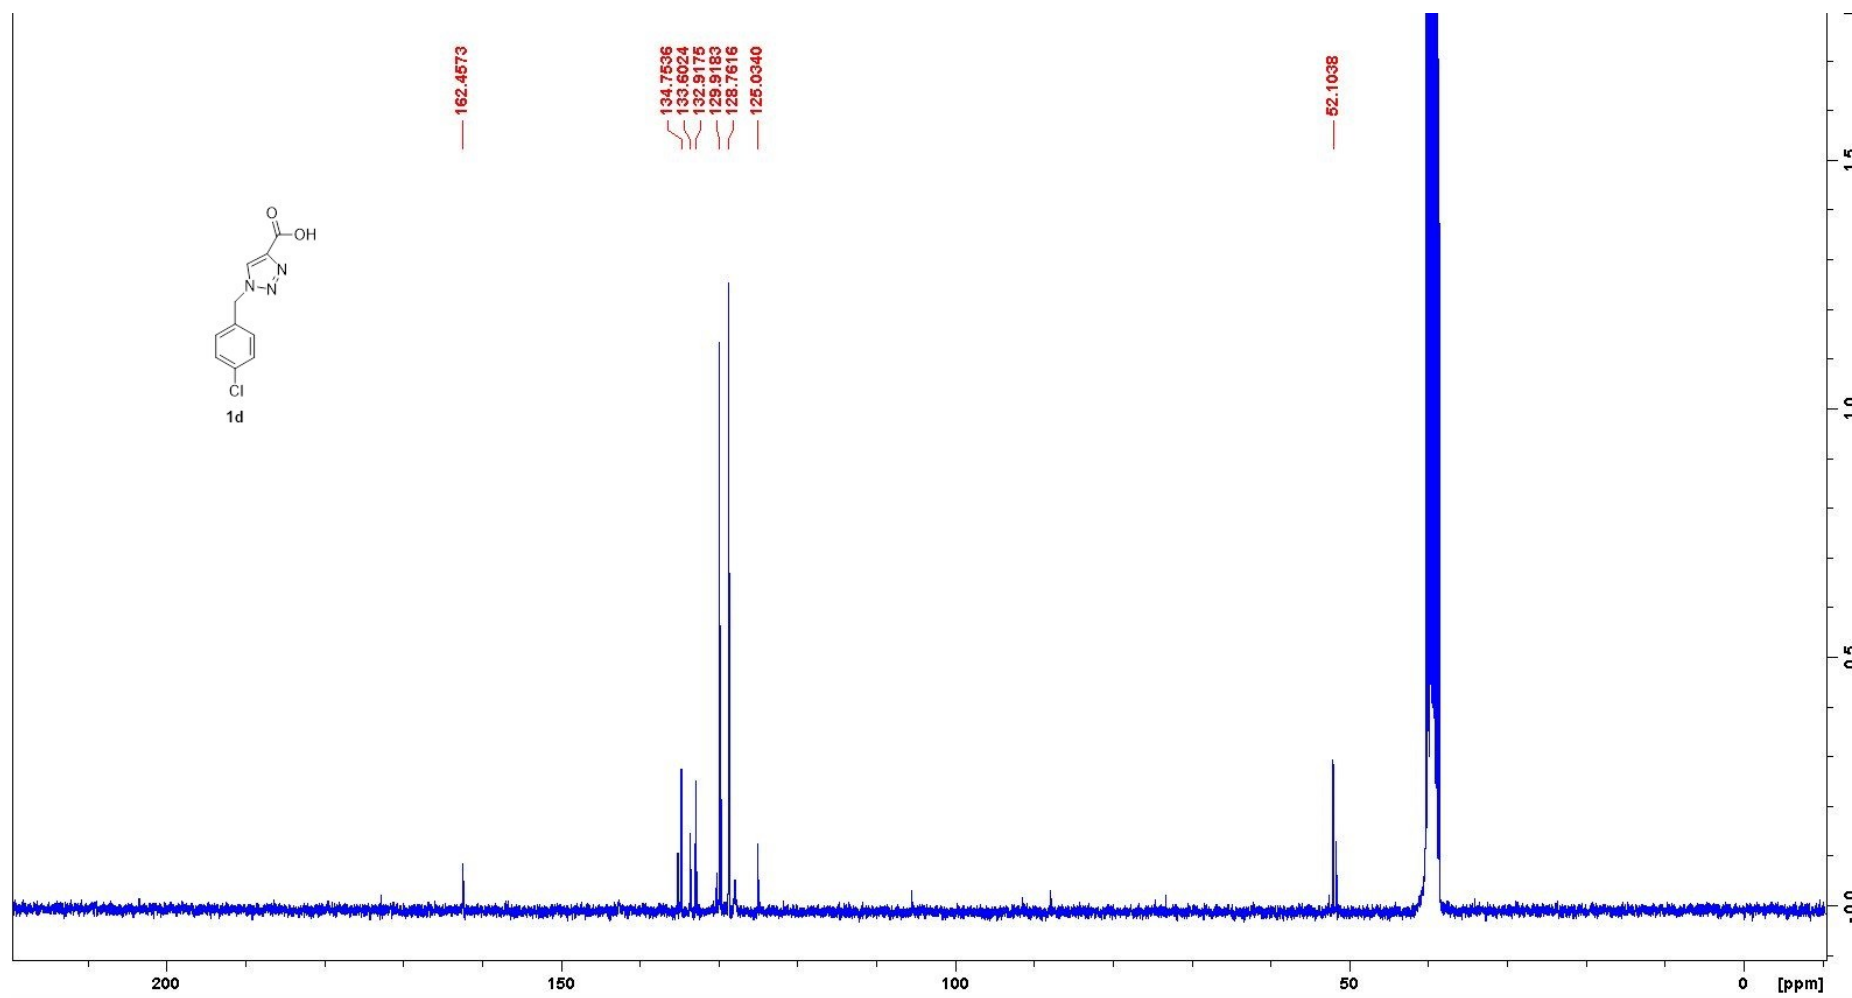



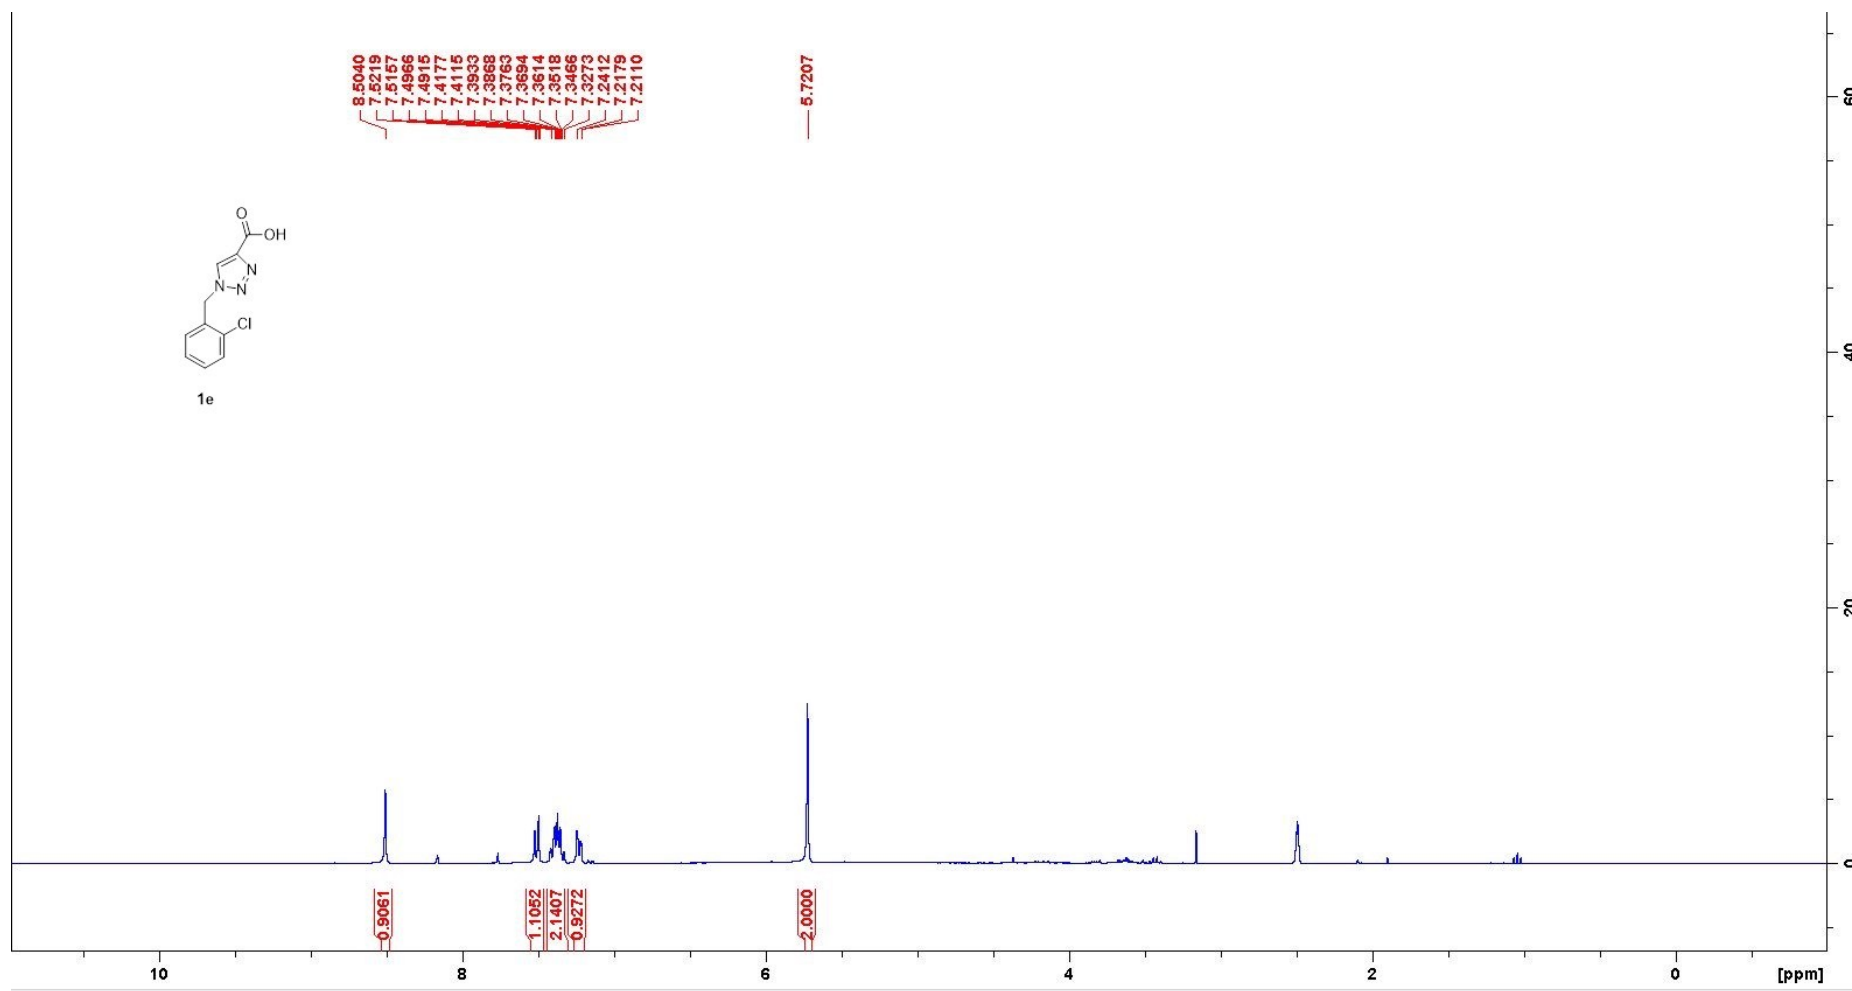

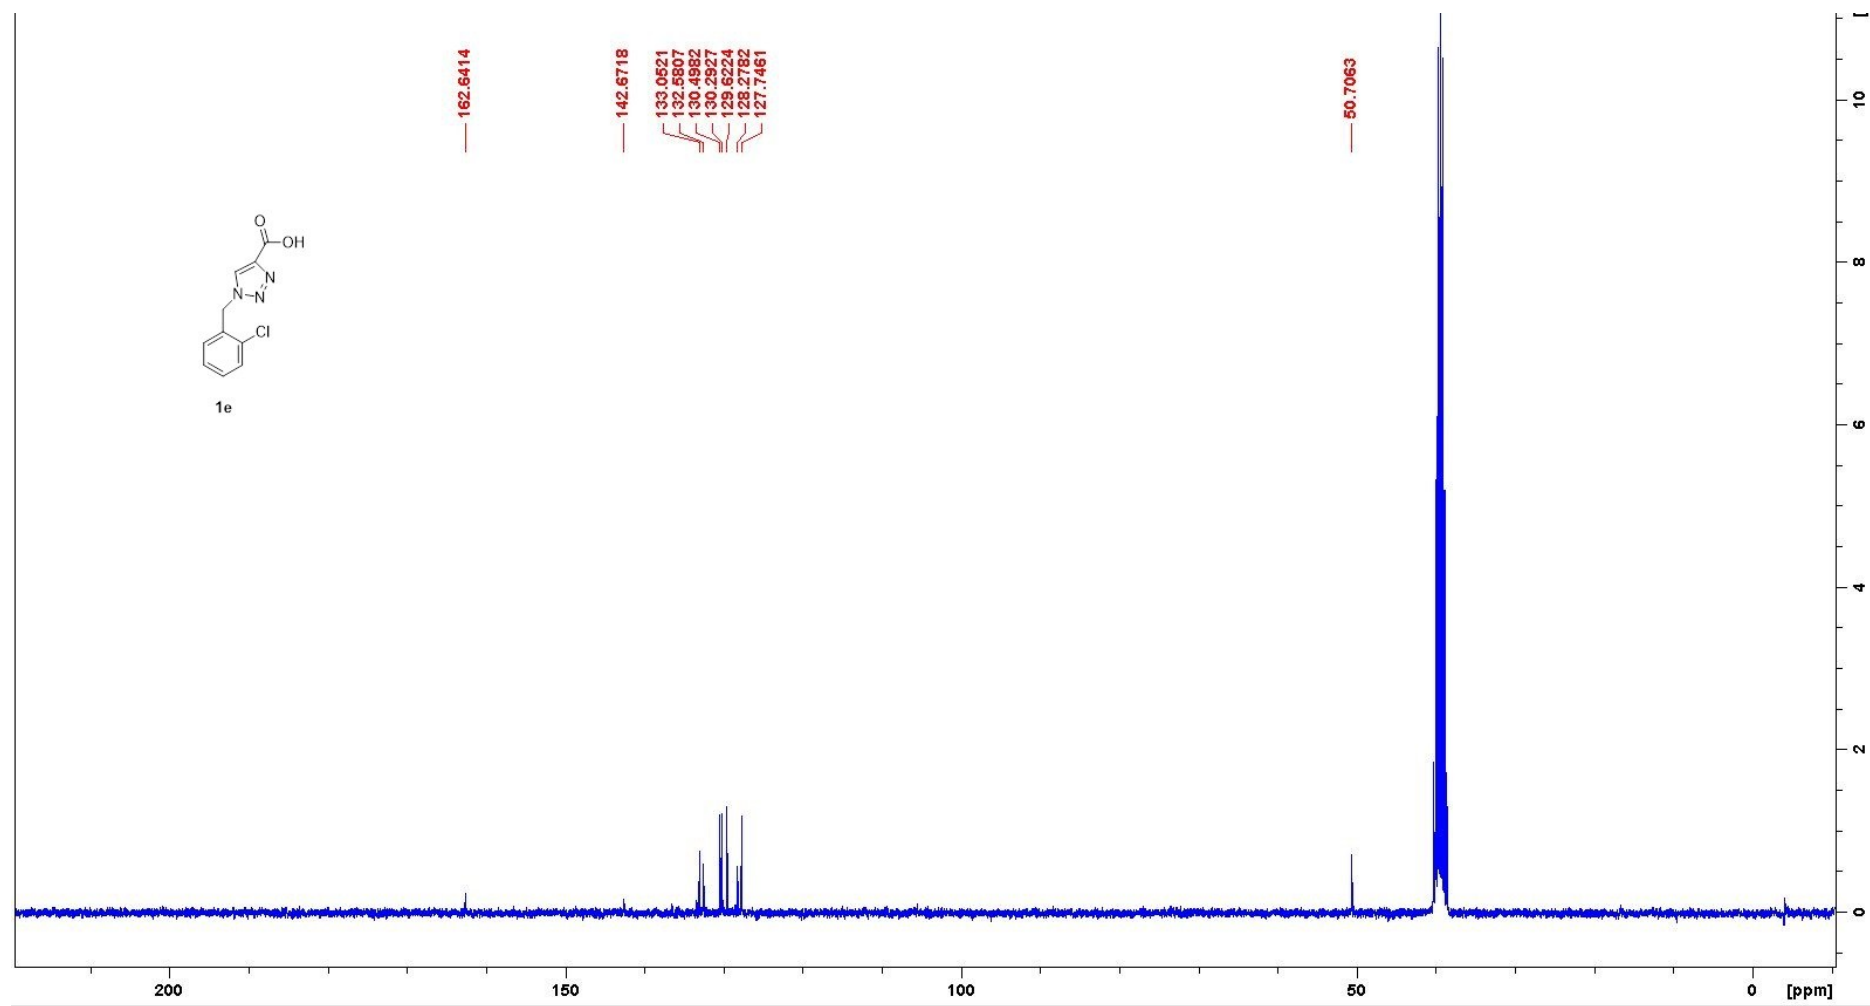

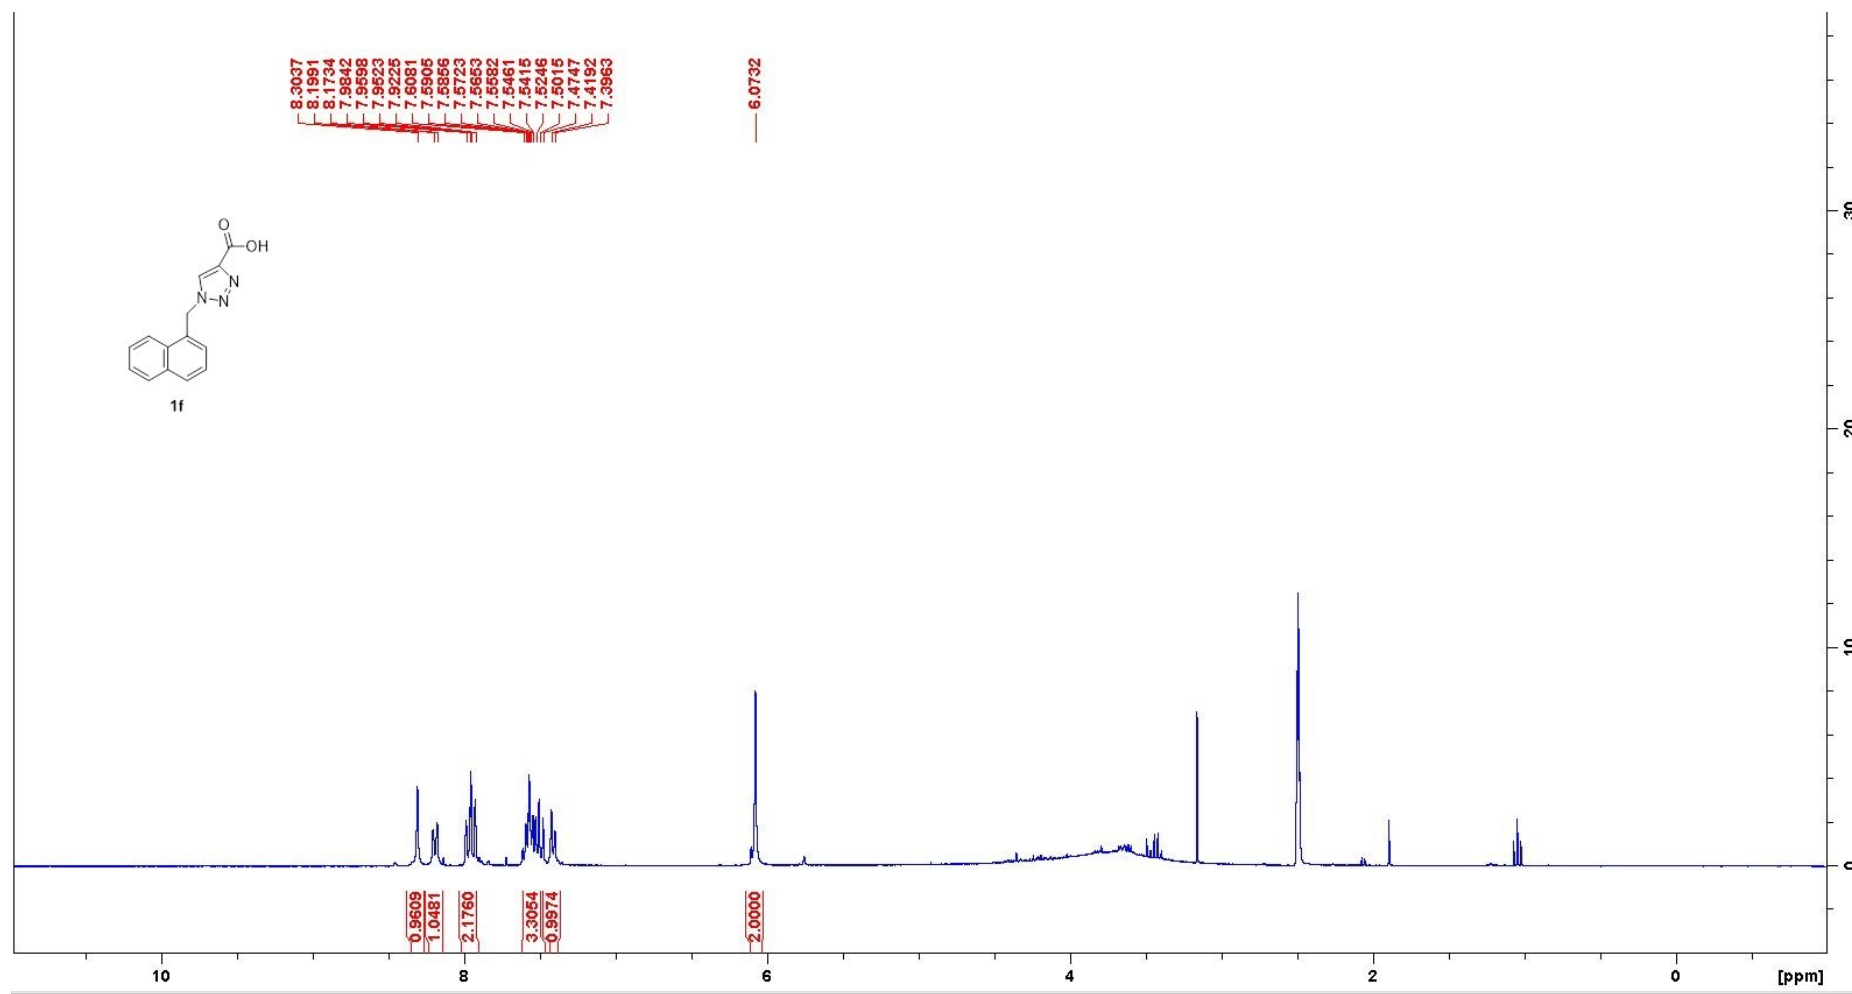

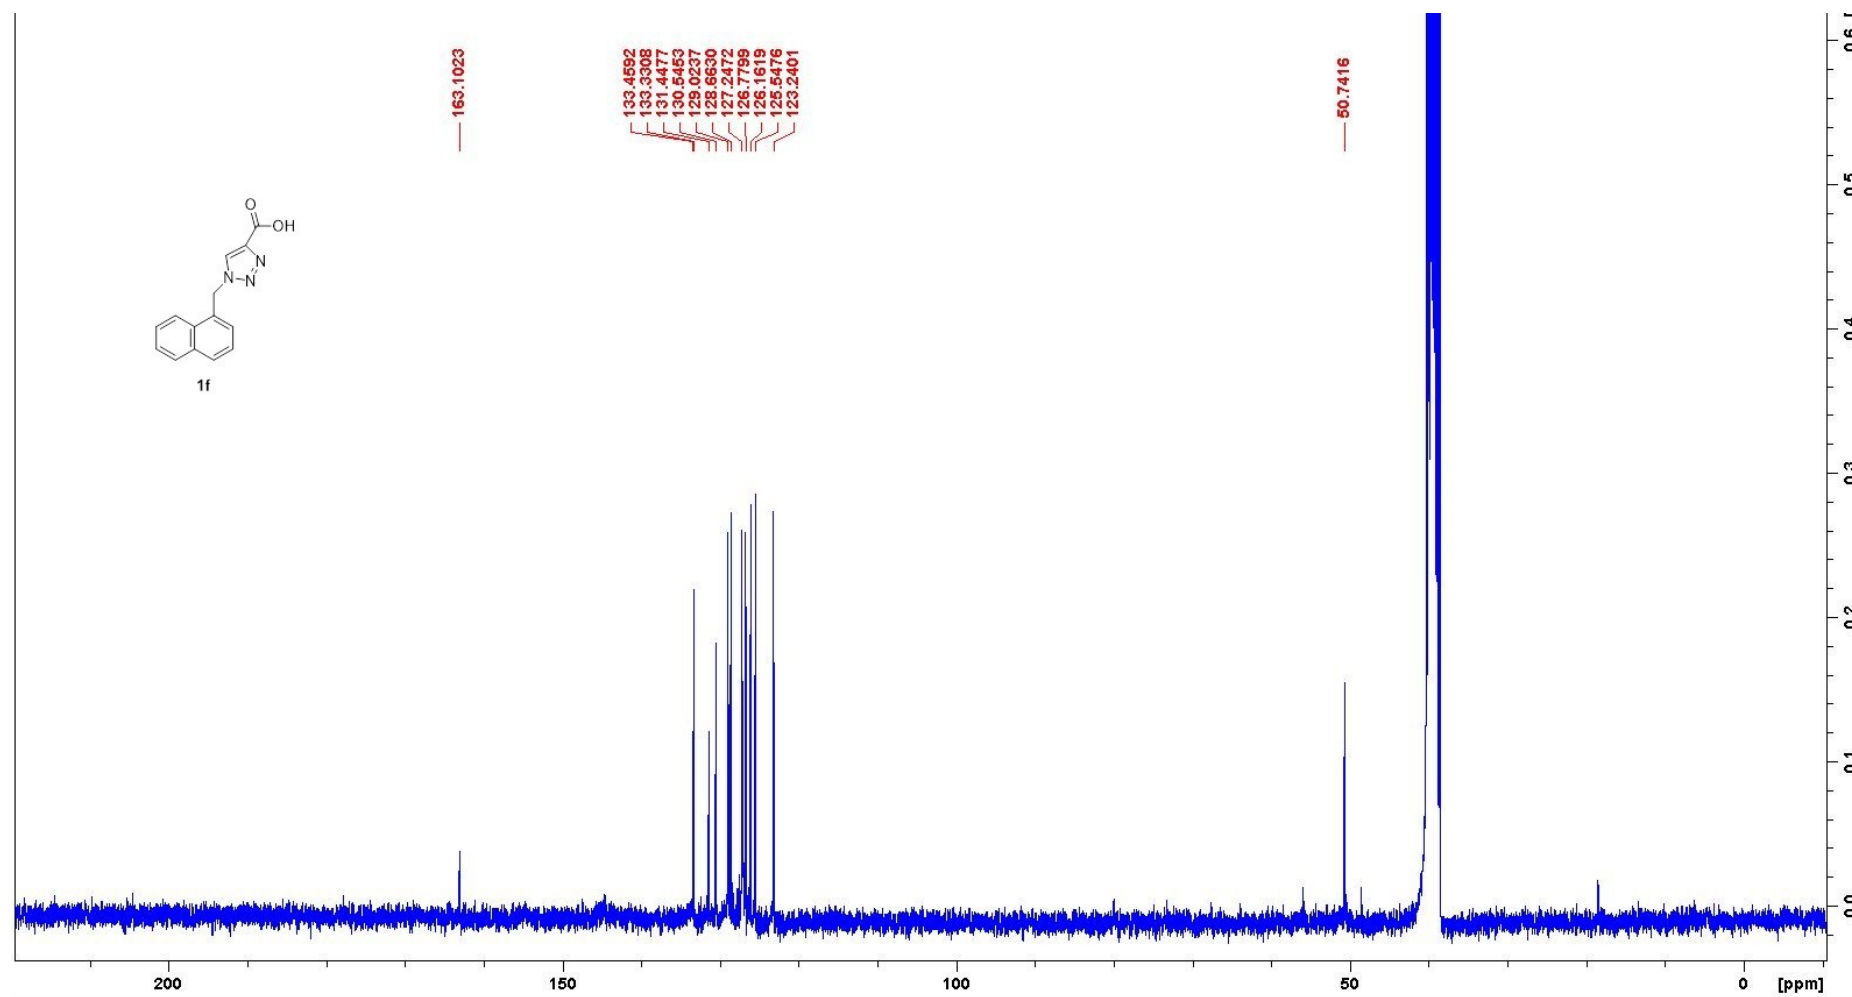

Supplement: c8md00491a1.pdf [file c8md00491a1.pdf]
